# Supplementary material for: Pathobiological Pseudohypoxia as a Putative Mechanism Underlying Myelodysplastic Syndromes
Source: Oxford University Press journal article supplement (doi:10.1158/2159-8290.cd-17-1203), 2018-08-23
Supplement: 21598290cd171203-sup-191539_2_supp_4950540_pd5gcv.xlsx [file 21598290cd171203-sup-191539_2_supp_4950540_pd5gcv.xlsx]

## Sheet: Supplementary Table 4
Supplementary Table 4
		Relative Expression (median centered - log2)					Prior HIF1 target evidences
uid	row_clusters-flat	Mll-PTD_Runx1KO:GH21_ATCACG	Mll-PTD_Runx1KO:GH22_TAGCTT	Mll-PTD_Runx1KO-HIF1aKO:GH23_AGTTCC	Mll-PTD_Runx1KO-HIF1aKO:GH24_GGTAGC		Amit DC-ChIP	ELVIDGE_HIF1A_AND_HIF2A_TARGETS.Elvidge-MSigDB	GROSS_HIF1A_TARGETS_DN.MSiGDB	Littman-TH17-Hif1a.MSigDB	HIF-1-alpha transcription factor network.PathwayCommons	QI_HYPOXIA_TARGETS_OF_HIF1A_AND_FOXA2.MSigDB	HIF1A_HUMAN(Source:HIF1A_schodel-PAZAR).schodel-ChiP	SEMENZA_HIF1_TARGETS.Semenza-MSigDB	HIF1_HUMAN(Source:HIF1 TFBS-PAZAR)	HIF1A_HUMAN(Source:HIF1A_Xia-PAZAR)	WGRV	Combined-Evidence
Tlr8	7	-0.714247	-1.48801	-0.0459098	0.0459098		0	0	0	0	0	0	0	0	0	0	0	0
Scrg1	7	-0.69074	-1.31153	0.0422394	-0.0422394		0	0	0	0	0	0	0	0	0	0	0	0
S100a9	7	-0.954106	-1.28385	0.0503547	-0.0503547		0	0	0	0	0	0	0	0	0	0	0	0
Plbd1	7	-1.1374	-1.28447	0.0431791	-0.0431791		0	0	0	0	0	0	0	0	0	0	1	1
Arap3	7	-1.5204	-1.70827	0.166604	-0.166604		0	0	0	0	0	0	0	0	0	0	0	0
Ear2	7	-1.82171	-1.90347	0.309648	-0.309648		0	0	0	0	0	0	0	0	0	0	0	0
Ifitm6	7	-1.07526	-1.06379	-0.0237298	0.0237298		0	0	0	0	0	0	0	0	0	0	0	0
Inhba	7	-1.15117	-1.10098	0.141678	-0.141678		0	0	0	1	0	0	1	0	0	0	1	3
Ankrd22	7	-0.761013	-1.50877	-0.0827867	0.0827867		0	0	0	0	0	0	0	0	0	0	0	0
Dmxl2	7	-1.55133	-1.52159	-0.0342507	0.0342507		0	0	0	0	0	0	0	0	0	0	0	0
5330426P16Rik	7	-0.956127	-1.06013	-0.161366	0.161366		1	0	0	1	0	0	0	0	0	0	0	2
Fcna	7	-1.67512	-1.13248	-0.147674	0.147674		0	0	0	0	0	0	0	0	0	0	0	0
Rin2	7	-1.10019	-2.27266	0.133593	-0.133593		0	0	0	0	0	0	0	0	0	0	0	0
Ebf1	7	-0.993601	-1.15866	0.045031	-0.045031		0	0	0	1	0	0	0	0	0	0	0	1
Bfsp2	7	-1.33511	-1.47798	0.0631405	-0.0631405		0	0	0	0	0	0	0	0	0	0	0	0
Vpreb1	7	-1.88578	-2.04107	-0.228633	0.228633		0	0	0	0	0	0	0	0	0	0	0	0
Ly6g	7	-2.42708	-2.49452	-0.163556	0.163556		0	0	0	0	0	0	0	0	0	0	0	0
Mmp9	7	-1.75359	-1.9373	-0.0748561	0.0748561		0	0	0	0	0	0	0	0	0	0	0	0
Igll1	7	-1.87261	-1.87261	0.00651801	-0.00651801		0	0	0	0	0	0	0	0	0	0	0	0
Ltf	7	-1.19414	-1.29266	0.0194597	-0.0194597		0	0	0	0	0	0	0	0	0	0	0	0
Trim30b	7	-1.23358	-1.28904	0.0934244	-0.0934244		0	0	0	0	0	0	0	0	0	0	0	0
Lilrb3	7	-1.22145	-0.883295	-0.0157913	0.0157913		0	0	0	0	0	0	0	0	0	0	0	0
Phospho1	7	-1.49044	-1.10911	-0.0697415	0.0697415		0	0	0	1	0	0	0	0	0	0	0	1
Vpreb3	7	-2.34951	-2.09034	-0.232295	0.232295		0	0	0	0	0	0	0	0	0	0	0	0
Rab13	7	-1.07535	-0.96647	-0.0638164	0.0638164		0	0	0	0	0	0	0	0	0	0	0	0
Upp1	7	-1.1435	-1.1435	-0.101338	0.101338		0	0	0	1	0	0	0	0	0	0	0	1
Lef1	7	-1.115	-1.08093	0.00296828	-0.00296828		0	0	0	1	0	0	0	0	0	0	0	1
1700037H04Rik	7	-1.23872	-0.817546	-0.143258	0.143258		0	0	0	0	0	0	0	0	0	0	0	0
Ces1d	7	-1.24149	-1.37485	-0.441028	0.441028		0	0	0	0	0	0	0	0	0	0	0	0
Ccdc91	7	-1.23918	-0.867564	-0.0101783	0.0101783		0	0	0	0	0	0	0	0	0	0	0	0
Optn	7	-1.51605	-1.04261	0.0511109	-0.0511109		0	0	0	0	0	0	0	0	0	0	0	0
Cd19	7	-2.17732	-2.14169	-0.0604394	0.0604394		0	0	0	0	0	0	0	0	0	0	0	0
Cd79a	7	-1.79303	-2.08003	0.139896	-0.139896		0	0	0	0	0	0	0	0	0	0	0	0
Pou2af1	7	-1.57245	-1.88086	-0.239001	0.239001		0	0	0	0	0	0	0	0	0	0	0	0
Siglece	7	-2.96456	-2.66388	0.0254465	-0.0254465		0	0	0	0	0	0	0	0	0	0	0	0
Mgst1	7	-1.19169	-1.02127	-0.0378893	0.0378893		0	0	0	0	0	0	0	0	0	0	0	0
Vill	7	-3.05896	-2.44662	-0.212555	0.212555		0	0	0	0	0	0	0	0	0	0	0	0
4930431P03Rik	7	-1.25951	-1.22137	0.0728594	-0.0728594		0	0	0	0	0	0	0	0	0	0	0	0
Alox5	7	-1.67611	-1.45353	-0.0187607	0.0187607		0	0	0	0	0	0	0	0	0	0	0	0
Fpr2	7	-2.28744	-2.3356	-0.0768167	0.0768167		0	0	0	0	0	0	0	0	0	0	0	0
Dock1	7	-1.03864	-1.21415	-0.00224421	0.00224421		0	0	0	0	0	0	0	0	0	0	0	0
Mmp8	7	-2.60413	-2.90409	-0.0314423	0.0314423		0	0	0	0	0	0	0	0	0	0	0	0
Samd9l	7	-1.21019	-1.36673	-0.0320882	0.0320882		0	0	0	1	0	0	0	0	0	0	0	1
Gadd45g	7	-0.925493	-1.12499	-0.0668587	0.0668587		0	0	0	1	0	0	0	0	0	0	1	2
St3gal5	7	-3.13465	-3.29192	-0.0679026	0.0679026		0	0	0	0	0	0	0	0	0	0	0	0
Slfn1	7	-1.86108	-1.88108	-0.00134588	0.00134588		0	0	0	0	0	0	0	0	0	0	0	0
Xdh	7	-1.4111	-1.42807	-0.0432057	0.0432057		0	0	0	0	0	0	0	0	0	0	0	0
Fpr1	7	-2.27528	-2.57228	0.000259261	-0.000259261		0	0	0	0	0	0	0	0	0	0	0	0
Itgb2l	7	-2.843	-3.06134	0.0271186	-0.0271186		0	0	0	0	0	0	0	0	0	0	0	0
Cd33	7	-2.16338	-2.24631	-0.0414848	0.0414848		0	0	0	0	0	0	0	0	0	0	0	0
F5	7	-2.22081	-2.16159	0.0174527	-0.0174527		0	0	0	0	0	0	0	0	0	0	0	0
Igf2r	7	-1.6072	-1.86749	-0.0297017	0.0297017		0	0	0	0	0	0	0	0	0	0	1	1
Cxcr2	7	-1.20103	-1.70729	0.0636286	-0.0636286		0	0	0	0	0	0	0	0	0	0	0	0
Mpp7	7	-1.94153	-2.06499	-0.0944446	0.0944446		0	0	0	0	0	0	0	0	0	0	0	0
Lyz2	7	-1.05452	-1.04602	-0.00438413	0.00438413		0	0	0	0	0	0	0	0	0	0	0	0
Tmcc1	7	-1.30048	-1.32653	-0.0226456	0.0226456		0	0	0	0	0	0	0	0	0	0	0	0
Ly75	7	-1.75654	-1.69285	0.0706041	-0.0706041		0	0	0	0	0	0	0	0	0	0	0	0
Ifnlr1	7	-1.58201	-1.63311	-0.0459517	0.0459517		0	0	0	0	0	0	0	0	0	0	0	0
Fmnl2	7	-1.24884	-1.35161	-0.0302113	0.0302113		0	0	0	1	0	0	0	0	0	0	0	1
Chi3l1	7	-4.88249	-5.22857	-0.0583341	0.0583341		0	0	0	0	0	0	0	0	0	0	0	0
Phlda1	7	-1.26776	-1.44359	-0.110836	0.110836		0	0	0	1	0	0	0	0	0	0	0	1
Sgk1	7	-1.27491	-1.09616	0.111153	-0.111153		0	0	0	0	0	0	0	0	0	0	0	0
Cd55	7	-1.98939	-1.78539	0.130977	-0.130977		0	0	0	0	0	0	0	0	0	0	0	0
Bcar3	7	-1.32994	-1.21572	0.0994193	-0.0994193		0	0	0	0	0	0	0	0	0	0	0	0
Mmp14	7	-1.40496	-1.15029	0.112322	-0.112322		0	0	0	0	0	0	0	0	0	0	1	1
Ube2l6	7	-1.931	-1.79876	-0.00195229	0.00195229		0	0	0	0	0	0	0	0	0	0	0	0
Tcf19	7	-1.49411	-1.55964	0.0325416	-0.0325416		0	0	0	0	0	0	0	0	0	0	0	0
Ica1	7	-4.07375	-3.63345	-0.0672181	0.0672181		0	0	0	0	0	0	0	0	0	0	1	1
Kcnj2	7	-1.10533	-1.06454	-0.0452178	0.0452178		0	0	0	0	0	0	1	0	0	0	0	1
Rag1	7	-2.01768	-2.01768	-0.0447648	0.0447648		0	0	0	0	0	0	0	0	0	0	0	0
Mns1	7	-1.30139	-1.20844	-0.0278345	0.0278345		0	0	0	0	0	0	0	0	0	0	0	0
Rras2	7	-1.02636	-1.00397	-0.145695	0.145695		0	0	0	0	0	0	0	0	0	0	0	0
Il1rn	7	-1.86083	-1.35104	-0.00806257	0.00806257		0	0	0	0	0	0	0	0	0	0	0	0
Slfn4	7	-2.40797	-1.91794	0.00174841	-0.00174841		0	0	0	0	0	0	0	0	0	0	0	0
Asns	7	-3.49791	-2.38741	0.0909442	-0.0909442		0	0	0	0	0	0	0	0	0	0	0	0
Retnlg	7	-2.39003	-3.08861	0.0453664	-0.0453664		0	0	0	0	0	0	0	0	0	0	0	0
Aldh1a7	7	-1.40955	-1.47708	0.0164044	-0.0164044		0	0	0	0	0	0	0	0	0	0	0	0
Cyth3	7	-2.61263	-2.76034	0.217391	-0.217391		0	0	0	0	0	0	0	0	0	0	0	0
Chi3l3	7	-1.07273	-1.21202	0.0245431	-0.0245431		0	0	0	0	0	0	0	0	0	0	0	0
Asprv1	7	-1.84288	-1.96207	-0.0032105	0.0032105		0	0	0	1	0	0	0	0	0	0	0	1
Dapk2	7	-1.36595	-1.5473	0.166477	-0.166477		0	0	0	1	0	0	0	0	0	0	0	1
Leprel1	7	-1.26447	-1.23421	0.313685	-0.313685		0	0	0	0	0	0	0	0	0	0	0	0
Pcbp3	7	-1.49309	-1.65198	0.298601	-0.298601		0	0	0	1	0	0	0	0	0	0	0	1
Fkbp11	7	-1.08849	-1.61319	0.134195	-0.134195		0	0	0	0	0	0	0	0	0	0	0	0
Prnp	7	-1.5895	-2.33617	0.0445924	-0.0445924		0	0	0	1	0	0	0	0	0	0	0	1
Nqo1	7	-0.975885	-1.33808	0.120303	-0.0533429		0	0	0	0	0	0	0	0	0	0	0	0
ENSMUSG00000091838	7	-0.897799	-1.03039	0.302841	-0.17213		0	0	0	0	0	0	0	0	0	0	0	0
Ceacam10	7	-1.54301	-1.88686	-0.00729821	0.00729821		0	0	0	0	0	0	0	0	0	0	0	0
Chchd10	7	-1.26357	-1.81768	-0.0727728	0.0727728		0	0	0	0	0	0	0	0	0	0	0	0
Calcrl	7	-0.950791	-1.36132	-0.109617	0.109617		0	0	0	0	0	0	0	0	0	0	0	0
B230118H07Rik	7	-2.64837	-3.61146	-0.116654	0.116654		0	0	0	0	0	0	0	0	0	0	0	0
Mt2	7	-1.27724	-2.30498	-0.235287	0.235287		0	0	0	0	0	0	0	0	0	0	0	0
Pbx1	7	-2.27763	-2.58196	-0.299826	0.748044		0	0	0	0	0	0	0	0	0	0	0	0
Oas2	7	-1.95831	-1.79749	0.0674167	0.104003		0	0	0	0	0	0	0	0	0	0	0	0
Gdf3	7	-1.04608	-1.00858	0.0491756	0.0365721		0	0	0	0	0	0	0	0	0	0	0	0
Mllt4	7	-2.1008	-1.57366	0.189636	-0.133252		1	0	0	0	0	0	0	0	0	0	0	1
Trib2	7	-1.17058	-1.09937	0.311237	-0.0180551		0	0	0	1	0	0	0	0	0	0	0	1
Gm20412	7	-0.886341	-0.886341	0.435673	-0.206306		0	0	0	0	0	0	0	0	0	0	0	0
Coro2b	7	-0.915729	-0.893028	0.497374	-0.267008		0	0	0	1	0	0	0	0	0	0	0	1
Id3	7	-0.863424	-1.02851	0.571472	0.000344433		0	0	0	1	0	0	0	0	0	0	0	1
Mgll	7	-2.19813	-1.6216	-0.0223226	0.0223226		0	0	0	1	0	0	0	0	0	0	1	2
Ampd3	7	-1.41175	-1.21331	-0.0649308	0.0649308		0	0	0	0	0	0	0	0	0	0	0	0
Pde8a	7	-1.79355	-1.02092	-0.079026	0.079026		0	0	0	1	0	0	0	0	0	0	0	1
Acsl6	7	-1.304	-1.09008	-0.138153	0.138153		0	0	0	1	0	0	0	0	0	0	0	1
Arvcf	7	-1.26574	-0.931253	-0.140889	0.140889		0	0	0	0	0	0	0	0	0	0	0	0
Bace1	7	-1.75803	-1.44313	-0.209421	0.209421		0	0	0	0	0	0	0	0	0	0	0	0
Bex4	7	-1.98594	-1.29493	-0.331302	0.435462		0	0	0	0	0	0	0	0	0	0	0	0
Gca	7	-1.29883	-0.761456	0.046539	0.00855023		0	0	0	0	0	0	0	0	0	0	0	0
Ttc39b	7	-1.1872	-0.916515	-0.060689	0.060689		0	0	0	1	0	0	0	0	0	0	0	1
Car1	7	-3.58062	-2.83229	-0.404159	0.404159		0	0	0	0	0	0	0	0	0	0	0	0
Cela1	7	-1.56258	-1.17357	-0.11233	0.11233		0	0	0	1	0	0	0	0	0	0	0	1
Aph1b	7	-1.96552	-1.81706	0.136338	-0.136338		0	0	0	0	0	0	0	0	0	0	0	0
Pecr	7	-1.66154	-1.42208	0.0790601	-0.0790601		0	0	0	1	0	0	0	0	0	0	0	1
E330009J07Rik	7	-1.96243	-1.8264	0.0119124	-0.0119124		0	0	0	1	0	0	0	0	0	0	0	1
Slco4c1	7	-0.960029	-1.08793	-0.0714564	0.0714564		0	0	0	0	0	0	0	0	0	0	0	0
Fam132a	7	-1.77229	-1.87951	0.154541	-0.154541		0	0	0	0	0	0	0	0	0	0	0	0
Gm11887	7	-2.17915	-2.17915	0.343107	-0.343107		0	0	0	0	0	0	0	0	0	0	0	0
Mrc1	7	-1.65726	-1.6668	0.121138	-0.0566244		1	0	0	0	0	0	0	0	0	0	0	1
2810025M15Rik	7	-1.38584	-1.35961	0.0840343	-0.0147502		0	0	0	0	0	0	0	0	0	0	0	0
Ndufb4	7	-1.29891	-1.41395	0.1074	-0.0212129		0	0	0	0	0	0	0	0	0	0	0	0
Gm6851	7	-1.87349	-1.55747	0.607013	-0.607013		0	0	0	0	0	0	0	0	0	0	0	0
Gclm	7	-1.33866	-0.684374	-0.0119092	0.316732		0	0	0	0	0	0	0	0	0	0	0	0
Rnf31	7	-0.832589	-0.574992	-0.0225188	0.694279		0	0	0	0	0	0	0	0	0	0	0	0
Vprbp	7	-0.852209	-0.817561	-0.0205065	0.434195		0	0	0	0	0	0	0	0	0	0	0	0
Gm15920	7	-0.551964	-0.551964	1.01308	0.551964		0	0	0	0	0	0	0	0	0	0	0	0
2510003D18Rik	6	-1.81526	-1.82724	0.139067	-0.0887688		0	0	0	0	0	0	0	0	0	0	0	0
Klf1	6	-3.28488	-3.34574	0.182384	0.159326		0	0	0	1	0	0	0	0	0	0	0	1
Akr1e1	6	-1.4747	-1.30432	0.00686307	0.0853619		0	0	0	0	0	0	0	0	0	0	0	0
Gm10430	6	-2.36747	-2.10181	0.12962	0.131355		0	0	0	0	0	0	0	0	0	0	0	0
Slc40a1	6	-1.68096	-1.45741	0.0797719	0.132691		0	0	0	0	0	0	0	0	0	0	0	0
Tmem159	6	-2.05129	-1.7197	0.406319	0.143104		0	0	0	0	0	0	0	0	0	0	0	0
Atp7b	6	-1.30047	-1.49326	0.00680198	0.0648864		0	0	0	1	0	0	0	0	0	0	0	1
Gpr128	6	-2.06647	-2.34908	0.0940111	0.318669		0	0	0	0	0	0	0	0	0	0	0	0
Pla2g12a	6	-1.66018	-2.14851	-0.00245514	0.00245514		0	0	0	1	0	0	0	0	0	0	1	2
Afap1	6	-1.95567	-1.92669	0.125453	0.304819		0	0	0	1	0	0	0	0	0	0	0	1
Tmem9	6	-2.45384	-2.36621	0.160897	0.615532		0	0	0	0	0	0	0	0	0	0	0	0
Chst10	6	-1.13168	-1.19152	0.057222	0.283664		0	0	0	1	0	0	0	0	0	0	0	1
Gramd2	6	-0.884025	-0.954133	-0.0102948	0.196861		1	0	0	1	0	0	0	0	0	0	0	2
Prdx2	6	-1.44397	-1.43229	0.116622	0.166276		0	0	0	0	0	0	0	0	0	0	0	0
ENSMUSG00000054040	6	-1.44118	-1.43296	0.152843	0.231199		0	0	0	0	0	0	0	0	0	0	0	0
Rag2	6	-2.075	-1.972	0.225657	0.316123		0	0	0	0	0	0	0	0	0	0	0	0
Gstm5	6	-2.31656	-2.27768	0.105878	0.155496		0	0	0	0	0	0	0	0	0	0	0	0
Fer	6	-1.55237	-1.41456	0.0960361	0.0987309		0	0	0	0	0	0	0	0	0	0	0	0
Lmna	6	-1.97032	-1.70771	0.162043	0.268761		0	0	0	1	0	0	0	0	0	0	0	1
Slc43a1	6	-2.03524	-2.08958	0.286237	0.138356		0	0	0	0	0	0	0	0	0	0	1	1
Sphk1	6	-3.30383	-3.42239	0.242447	0.200884		0	0	0	0	0	0	0	0	0	0	0	0
Zfp783	6	-2.13031	-2.15858	0.259044	0.0400258		0	0	0	0	0	0	0	0	0	0	0	0
Tfpi	6	-1.82535	-1.91333	0.195173	0.238845		0	0	0	0	0	0	0	0	0	0	0	0
Paqr9	6	-2.02525	-2.12339	0.421362	0.643567		0	0	0	0	0	0	0	0	0	0	0	0
Mgst3	6	-1.75206	-1.81425	0.258727	0.4851		0	0	0	0	0	0	0	0	0	0	0	0
Il1f9	6	-2.31502	-2.46853	0.62859	0.471307		0	0	0	0	0	0	0	0	0	0	0	0
Spire1	6	-2.25728	-2.32859	0.357265	0.434199		0	0	0	0	0	0	0	0	0	0	0	0
Thbs1	6	-3.11009	-3.03155	0.646737	0.634599		0	0	0	0	0	0	0	0	0	0	1	1
Nxpe2	6	-3.11068	-2.95532	0.624618	0.532002		0	0	0	0	0	0	0	0	0	0	0	0
Mboat2	6	-1.53889	-1.51256	0.303035	0.214794		0	0	0	1	0	0	0	0	0	0	0	1
Ank1	6	-2.62245	-2.51656	0.807206	0.774065		1	0	0	0	0	0	0	0	0	0	0	1
Gpr125	6	-0.998443	-0.986792	0.103717	0.168018		0	0	0	0	0	0	0	0	0	0	0	0
Xrcc5	6	-1.74242	-1.48811	0.366836	0.330328		0	0	0	0	0	0	0	0	0	0	0	0
Add2	6	-2.35607	-2.37586	0.348436	0.263811		0	0	0	0	0	0	0	0	0	0	0	0
Tspo2	6	-3.48329	-3.47745	0.536448	0.525348		0	0	0	0	0	0	0	0	0	0	0	0
Hebp1	6	-3.09921	-2.7788	0.422485	0.402487		0	0	0	0	0	0	0	0	0	0	0	0
Fam213a	6	-1.96253	-2.00812	0.367035	0.126004		0	0	0	0	0	0	0	0	0	0	0	0
Agpat4	6	-1.32093	-1.47697	0.0293695	0.480571		0	0	0	0	0	0	0	0	0	0	0	0
Smim1	6	-2.05347	-2.29551	0.164855	0.757843		0	0	0	0	0	0	0	0	0	0	0	0
Rhd	6	-2.71275	-3.24838	0.436326	0.670908		0	0	0	0	0	0	0	0	0	0	0	0
Gata1	6	-2.13117	-2.82573	0.390191	0.709267		0	0	0	0	0	0	0	0	0	0	0	0
Daam1	6	-2.01174	-2.35062	0.330044	0.325443		1	0	0	0	0	0	0	0	0	0	0	1
Ctse	6	-2.41893	-3.08796	0.645253	0.681752		0	0	0	0	0	0	0	0	0	0	0	0
Aqp1	6	-2.81692	-3.56404	0.684808	0.707337		0	0	0	0	0	0	0	0	0	0	0	0
Slc25a21	6	-2.45886	-3.01204	0.53076	0.300375		0	0	0	0	0	0	0	0	0	0	0	0
Car13	6	-0.828642	-1.08859	0.128552	0.121909		0	0	0	1	0	0	0	0	0	0	0	1
Fkbp9	6	-1.07269	-0.875504	0.29861	0.373979		0	0	0	0	0	0	0	0	0	0	1	1
Plekhg1	6	-1.25626	-1.01559	0.331478	0.470319		0	0	0	0	0	0	0	0	0	0	0	0
Setd4	6	-1.17802	-0.806465	0.195961	-0.0341498		0	0	0	0	0	0	0	0	0	0	0	0
Crip2	6	-1.29905	-1.03977	0.388029	-0.136896		0	0	0	0	0	0	0	0	0	0	0	0
Gm5111	6	-1.17416	-1.17416	0.6471	-0.176489		0	0	0	0	0	0	0	0	0	0	0	0
Gzma	6	-1.83379	-1.83379	0.588494	0.174585		0	0	0	0	0	0	0	0	0	0	0	0
C530008M17Rik	6	-0.888178	-1.1353	0.190509	0.165816		0	0	0	0	0	0	0	0	0	0	0	0
Zfp386	6	-1.293	-1.49907	0.15886	0.218786		0	0	0	0	0	0	0	0	0	0	0	0
Lgr4	6	-1.18464	-1.12952	0.0259874	0.293392		0	0	0	0	0	0	0	0	0	0	0	0
Pde10a	6	-0.769188	-0.742376	0.104179	0.452625		0	0	0	0	0	0	0	0	0	0	1	1
Pf4	6	-1.86817	-1.38176	0.113993	0.835928		0	0	0	0	0	0	0	0	0	0	0	0
Gm13015	6	-2.88225	-2.88225	0.232011	1.76141		0	0	0	0	0	0	0	0	0	0	0	0
2210418O10Rik	6	-2.84651	-2.96294	0.277273	1.28424		0	0	0	0	0	0	0	0	0	0	0	0
Mylk3	6	-1.47404	-1.70317	0.0110962	0.528741		0	0	0	0	0	0	0	0	0	0	0	0
Ermap	6	-2.8307	-3.7945	0.217333	0.218024		0	0	0	0	0	0	0	0	0	0	0	0
Tfr2	6	-1.51786	-1.99257	0.00257761	0.0308451		0	0	0	0	0	0	0	0	0	0	0	0
Gfi1b	6	-2.56235	-3.33768	0.163642	0.0605436		0	0	0	0	0	0	0	0	0	0	0	0
Isg20	6	-1.53821	-2.66406	0.133072	-0.0311035		0	1	0	0	0	0	0	0	0	0	0	1
Gm12245	6	-1.66698	-2.41253	0.647859	0.00646686		0	0	0	0	0	0	0	0	0	0	0	0
Hmgb3	6	-0.854722	-1.1381	0.133079	0.205488		0	0	0	0	0	0	0	0	0	0	0	0
Sdsl	6	-1.29586	-1.75466	-0.00489293	0.246873		0	0	0	1	0	0	0	0	0	0	0	1
Xlr4b	6	-1.15078	-1.58649	0.00785635	0.365937		0	0	0	0	0	0	0	0	0	0	0	0
Ass1	6	-1.08116	-1.90901	-0.0304771	0.0609035		0	0	0	0	0	0	0	0	0	0	0	0
Pklr	6	-2.49685	-3.64318	0.236143	0.255983		0	0	0	0	0	0	0	0	0	0	0	0
Ctla2a	6	-1.14385	-1.90442	0.324706	0.297568		0	0	0	0	0	0	0	0	0	0	0	0
Hpn	6	-1.31568	-2.18707	0.38327	0.459823		0	0	0	0	0	0	0	0	0	0	0	0
Abcg3	6	-0.564958	-1.08703	0.251045	0.211853		0	0	0	1	0	0	0	0	0	0	0	1
Ngfrap1	6	-1.29873	-2.32388	0.448101	0.632702		0	0	0	0	0	0	0	0	0	0	0	0
Golm1	6	-0.54123	-1.14414	0.197932	0.238237		0	0	0	0	0	0	0	0	0	0	0	0
Ifi27l2a	6	-1.2537	-2.29808	0.201333	0.267543		0	0	0	0	0	0	0	0	0	0	0	0
Scd1	6	-0.577954	-1.25371	-0.0100394	0.299727		0	0	0	0	0	0	0	0	0	0	0	0
Pla2g16	6	-0.738115	-1.42508	-0.00774119	0.196994		0	0	0	0	0	0	0	0	0	0	0	0
Igkv19-93	6	-1.39421	-3.12704	0.305925	0.682276		0	0	0	0	0	0	0	0	0	0	0	0
Dcun1d4	6	-0.616119	-1.24021	0.472336	0.447757		0	0	0	0	0	0	0	0	0	0	0	0
Ablim1	6	-0.849226	-1.4251	0.385437	0.352737		0	0	0	1	0	0	0	0	0	0	0	1
Rtp4	6	-1.1147	-1.81288	0.47943	0.235417		0	0	0	0	0	0	0	0	0	0	0	0
Glrx5	6	-0.672473	-1.3681	0.279253	-0.00494138		0	0	0	1	0	0	0	0	0	0	0	1
Bola3	6	-0.443416	-1.16365	0.376933	0.076078		0	0	0	0	0	0	0	0	0	0	0	0
Trim5	6	-0.57659	-1.19148	0.529427	-0.0261982		0	0	0	0	0	0	0	0	0	0	0	0
Gm11832	6	-0.692323	-1.73485	0.0881194	0.0204115		0	0	0	0	0	0	0	0	0	0	0	0
Eps8l1	6	-1.4948	-1.67057	0.753571	0.391509		0	0	0	0	0	0	0	0	0	0	0	0
Wbscr27	6	-0.737812	-0.974179	0.491005	0.221188		0	0	0	0	0	0	0	0	0	0	0	0
Gm13563	6	-0.866246	-0.810132	0.286093	0.0957428		0	0	0	0	0	0	0	0	0	0	0	0
Lax1	6	-1.23473	-1.23496	0.279623	0.325943		0	0	0	0	0	0	0	0	0	0	0	0
Zcchc3	6	-1.25719	-1.35682	0.338478	0.263684		0	0	0	0	0	0	0	0	0	0	0	0
Sept8	6	-2.22368	-2.31874	0.644342	0.552486		0	0	0	0	0	0	0	0	0	0	0	0
Blnk	6	-2.28451	-2.38046	0.720152	0.503642		0	0	0	0	0	0	0	0	0	0	0	0
Myo1d	6	-1.98634	-1.96725	0.503479	0.611074		0	0	0	0	0	0	0	0	0	0	0	0
Ces2g	6	-1.79994	-2.03087	0.599102	0.54906		0	0	0	0	0	0	0	0	0	0	0	0
Sh2d4a	6	-1.25571	-1.44774	0.384651	0.380703		0	0	0	0	0	0	0	0	0	0	0	0
Art4	6	-0.892841	-0.912314	0.155975	0.248612		0	0	0	0	0	0	0	0	0	0	0	0
Taf9b	6	-1.37252	-1.45133	0.472916	0.467506		0	1	0	0	0	0	0	0	0	0	0	1
Tbxa2r	6	-0.973396	-0.880475	0.263938	0.292039		0	0	0	0	0	0	0	0	0	0	0	0
Samd14	6	-1.54229	-1.47959	0.46805	0.518437		0	0	0	0	0	0	0	0	0	0	0	0
Rsad2	6	-1.1041	-1.14364	0.334298	0.548846		0	0	0	0	0	0	0	0	0	0	0	0
Mzb1	6	-2.69434	-3.01181	1.22907	1.45558		0	0	0	0	0	0	0	0	0	0	0	0
Cited4	6	-1.20385	-1.35785	0.597404	0.591715		0	0	0	0	0	0	0	0	0	0	0	0
Cdc25b	6	-0.676293	-0.944695	0.236895	0.3619		0	0	0	0	0	0	0	0	0	0	0	0
Josd2	6	-0.982354	-1.21174	0.250858	0.376276		0	0	0	0	0	0	0	0	0	0	0	0
Steap3	6	-0.857845	-0.718049	0.286105	0.277303		0	0	0	0	0	0	0	0	0	0	0	0
Aqp9	6	-1.49914	-1.36045	0.465213	0.526653		0	0	0	0	0	0	0	0	0	0	0	0
Tceal8	6	-2.69289	-2.31349	0.912044	1.04205		0	0	0	0	0	0	0	0	0	0	0	0
Emp1	6	-1.38219	-1.09044	0.346457	0.447588		0	0	0	0	0	0	0	0	0	0	0	0
Dkkl1	6	-1.56355	-1.22555	0.674293	0.565669		0	0	0	0	0	0	0	0	0	0	0	0
Sept4	6	-1.31103	-0.928657	0.575116	0.488738		0	0	0	0	0	0	0	0	0	0	0	0
Blvrb	6	-2.76694	-1.83916	1.10386	1.30317		0	0	0	0	0	0	0	0	0	0	0	0
Oas3	6	-1.43092	-1.22034	0.28775	0.341387		0	0	0	0	0	0	0	0	0	0	0	0
Cplx2	6	-1.68576	-1.85407	0.26089	0.288428		0	0	0	0	0	0	0	0	0	0	0	0
Spp1	6	-0.702484	-0.872603	0.0878886	0.362402		0	0	0	0	0	0	0	0	0	0	0	0
Gm4189	6	-0.829822	-0.730737	0.30848	0.28346		0	0	0	0	0	0	0	0	0	0	0	0
C330013J21Rik	6	-2.9645	-2.9645	1.3305	1.85317		0	0	0	0	0	0	0	0	0	0	0	0
Oas1c	6	-1.3077	-1.45293	0.473536	0.777702		0	0	0	0	0	0	0	0	0	0	0	0
Ly6d	6	-1.55335	-1.54303	0.48335	0.75388		0	0	0	0	0	0	0	0	0	0	0	0
Gm15915	6	-1.38667	-2.08291	1.04963	1.09005		0	0	0	0	0	0	0	0	0	0	0	0
Cxx1a	6	-0.820421	-1.1712	0.470151	0.603843		0	0	0	0	0	0	0	0	0	0	0	0
Thy1	6	-1.41652	-1.08918	0.696441	0.583218		0	0	0	1	0	0	0	0	0	0	0	1
Ninl	6	-0.998726	-0.633058	0.557125	0.607115		0	0	0	0	0	0	0	0	0	0	0	0
Irf4	6	-0.903196	-0.753124	0.635922	0.66623		0	0	0	1	0	0	0	0	0	0	1	2
Bdh1	6	-1.09124	-1.05145	0.772665	0.760341		0	0	0	0	0	0	0	0	0	0	0	0
Mid1	6	-2.15479	-2.41117	1.40706	1.33993		0	0	0	1	0	0	0	0	0	0	0	1
Ache	6	-1.5595	-1.50972	0.60964	1.21895		0	0	0	0	0	0	0	0	0	0	1	1
Cxx1b	6	-1.52796	-1.20948	0.75718	1.19688		0	0	0	0	0	0	0	0	0	0	0	0
Hnf4a	6	-0.570737	-0.752741	0.14828	0.622935		0	0	0	0	1	0	0	0	0	0	0	1
Aldh7a1	6	-0.749373	-0.669201	0.0580462	0.550259		0	0	0	0	0	0	0	0	0	0	0	0
Tac2	6	-0.99883	-0.99883	0.0196829	0.993043		0	0	0	0	0	0	0	0	0	0	0	0
Slamf7	6	-1.01402	-0.386591	0.367944	0.251641		0	0	0	1	0	0	0	0	0	0	0	1
Tcrg-C1	6	-0.782093	-0.782093	0.708832	0.0786429		0	0	0	0	0	0	0	0	0	0	0	0
Rhoc	6	-0.828704	-0.51384	0.672062	0.14566		0	0	0	0	0	0	0	0	0	0	0	0
Zfp600	6	-1.02959	-0.833653	0.52195	-0.0708344		0	0	0	0	0	0	0	0	0	0	0	0
Epor	6	-2.03316	-2.38775	0.966533	0.647754		0	0	0	0	0	0	0	0	0	0	0	0
Cdr2	6	-2.31997	-2.46044	0.918359	0.721826		0	0	0	0	0	0	0	0	0	0	0	0
Cldn13	6	-2.99313	-3.02706	1.01434	0.935797		0	0	0	0	0	0	0	0	0	0	0	0
Hemgn	6	-2.86444	-2.95102	1.10183	1.14569		0	0	0	0	0	0	0	0	0	0	0	0
Cd38	6	-1.15306	-1.08682	0.475391	0.435726		0	0	0	1	0	0	0	0	0	0	0	1
Reep6	6	-1.20193	-1.05268	0.506772	0.448683		0	0	0	1	0	0	0	0	0	0	0	1
Trim10	6	-1.55098	-1.65264	0.745287	0.678384		0	0	0	0	0	0	0	0	0	0	0	0
Il1rl1	6	-1.68687	-1.8286	0.501668	0.707711		0	0	0	0	0	0	0	0	0	0	0	0
Mfsd2b	6	-2.1572	-2.63893	0.57766	0.823142		0	0	0	0	0	0	0	0	0	0	0	0
Snca	6	-1.8459	-1.80578	0.992171	0.747243		0	0	0	0	0	0	0	0	0	0	0	0
Abcg4	6	-2.09505	-1.70901	1.2398	0.870762		0	0	0	0	0	0	0	0	0	0	0	0
Ctnnd1	6	-1.33028	-1.12643	0.868477	0.547464		0	0	0	0	0	1	0	0	0	0	0	1
Ppap2a	6	-1.68666	-1.45021	1.22749	0.930028		0	0	0	0	0	0	0	0	0	0	0	0
Rab3il1	6	-1.84858	-1.31523	0.797783	0.426845		0	0	0	0	0	0	0	0	0	0	1	1
Nudt12	6	-1.03102	-1.01352	0.584096	0.367837		0	0	0	0	0	0	0	0	0	0	0	0
Ypel4	6	-0.908826	-0.908826	0.658675	0.494158		0	0	0	0	0	0	0	0	0	0	1	1
Alas2	6	-2.73217	-2.67101	1.53635	1.4232		0	0	0	0	0	0	0	0	0	0	0	0
Rhag	6	-2.34045	-2.52399	1.40034	1.51247		0	0	0	0	0	0	0	0	0	0	0	0
Aldh1a1	6	-2.24956	-1.88201	1.31446	1.26609		0	0	0	0	0	0	0	0	0	0	0	0
Gimap9	6	-1.85197	-1.7861	0.933123	0.85241		0	0	0	0	0	0	0	0	0	0	0	0
Btnl10	6	-2.29321	-2.29055	1.31494	1.235		0	0	0	0	0	0	0	0	0	0	0	0
Spta1	6	-1.65114	-1.80762	1.0291	0.891719		0	0	0	0	0	0	0	0	0	0	0	0
Fnbp1l	6	-1.84855	-2.06917	1.17335	1.09048		0	0	0	0	0	0	0	0	0	0	0	0
Rhobtb3	6	-0.872174	-0.995293	0.521987	0.510977		0	0	0	0	0	0	0	0	0	1	0	1
Ell2	6	-0.878413	-0.778519	0.529547	0.633061		0	0	0	0	0	0	0	0	0	0	0	0
Sh3tc2	6	-1.19482	-1.19257	0.74918	0.913488		0	0	0	0	0	0	0	0	0	0	0	0
Col5a1	6	-1.41424	-1.65553	0.954936	1.14878		0	0	0	0	0	0	0	0	0	0	1	1
Igkj5	6	-2.14552	-2.23884	1.41437	1.52487		0	0	0	0	0	0	0	0	0	0	0	0
Epdr1	6	-1.74414	-2.20203	0.753162	0.739436		0	0	0	0	0	0	0	0	0	0	1	1
Pbx3	6	-1.49005	-1.87983	0.671379	0.527111		0	0	0	0	0	0	0	0	0	0	0	0
Zbtb46	6	-0.68102	-0.87027	0.277739	0.350698		0	0	0	0	0	0	0	0	0	0	0	0
Tal1	6	-1.52185	-1.86904	0.646726	0.67819		0	0	0	0	0	0	0	0	0	0	1	1
Hba-a2	6	-4.22925	-5.67943	1.6099	1.70141		0	0	0	0	0	0	0	0	0	0	0	0
Abcg2	6	-1.85975	-2.05667	0.78829	0.792805		0	0	0	0	1	0	0	0	1	0	0	2
Tmem56	6	-1.97427	-2.12099	0.782781	0.860124		0	0	0	1	0	0	0	0	0	0	1	2
Tspan33	6	-1.92893	-2.30306	1.10584	0.992497		0	0	0	0	0	0	0	0	0	0	1	1
Slc36a4	6	-1.35984	-1.65548	0.696378	0.697163		0	0	0	0	0	0	0	0	0	0	0	0
Hlf	6	-1.01002	-1.48252	0.60344	0.479247		0	0	0	1	0	0	0	0	0	0	0	1
Abcb4	6	-1.49735	-2.01921	0.396471	0.34338		0	0	0	0	0	0	0	0	0	0	0	0
Klra2	6	-1.22868	-1.69007	0.579581	0.508679		0	0	0	0	0	0	0	0	0	0	0	0
Ociad2	6	-0.579443	-0.879178	0.335664	0.251451		0	0	0	0	0	0	0	0	0	0	0	0
St3gal6	6	-2.28755	-3.40764	1.08067	1.43982		0	0	0	0	0	0	0	0	0	0	0	0
Atp1b2	6	-2.26832	-3.807	1.23532	1.51958		0	0	0	0	0	0	0	0	0	0	0	0
Myh10	6	-1.71938	-3.22422	1.23217	1.31921		0	0	0	0	0	0	0	0	0	0	0	0
Pcyt1b	6	-0.559293	-0.893134	0.417346	0.37416		0	0	0	0	0	0	0	0	0	0	0	0
Kel	6	-2.69654	-4.36038	1.81627	1.56179		0	0	0	0	0	0	0	0	0	0	0	0
Itm2a	6	-0.816719	-1.17872	0.540102	0.193404		0	0	0	0	0	0	0	0	0	0	0	0
Gimap6	6	-1.66934	-2.23215	1.08658	1.10052		0	0	0	0	0	0	0	0	0	0	0	0
Car2	6	-2.30832	-2.93987	1.31096	1.36374		0	0	0	0	0	0	0	0	0	0	0	0
Serpinb6b	6	-0.995936	-1.28301	0.623306	0.650139		0	0	0	0	0	0	0	0	0	0	0	0
Picalm	6	-0.536837	-0.729301	0.430855	0.454503		1	0	0	1	0	0	0	0	0	0	0	2
Fcrla	6	-0.931893	-1.29835	0.812439	0.671351		0	0	0	0	0	0	0	0	0	0	0	0
Clec1b	6	-0.84187	-1.15978	0.75494	0.593427		0	0	0	0	0	0	0	0	0	0	0	0
Gimap1	6	-1.15629	-2.08682	1.06786	0.86954		0	0	0	1	0	0	0	0	0	0	0	1
Gpc4	6	-0.586444	-0.872066	0.505358	0.332369		0	0	0	0	0	0	0	0	0	0	0	0
Pdia2	6	-1.66333	-1.66333	0.474209	1.03766		0	0	0	1	0	0	0	0	0	0	1	2
Psma8	6	-0.942086	-0.774108	0.263747	0.738113		0	0	0	0	0	0	0	0	0	0	0	0
Hbb-b2	6	-2.73245	-2.42031	1.75117	1.72855		0	0	0	0	0	0	0	0	0	0	0	0
Hba-a1	6	-3.50072	-2.76363	2.10375	1.80286		0	0	0	0	0	0	0	0	0	0	0	0
Stfa1	6	-2.94782	-2.58788	1.27536	1.18417		0	0	0	0	0	0	0	0	0	0	0	0
Xcl1	6	-0.746255	-0.746255	0.687821	0.167598		0	0	0	0	0	0	0	0	0	0	0	0
Gm16023	6	-0.695294	-0.724372	0.669123	-0.016866		0	0	0	0	0	0	0	0	0	0	0	0
Gm16538	6	-0.789238	-0.789238	0.830222	0.071097		0	0	0	0	0	0	0	0	0	0	0	0
Slc11a2	6	-0.536041	-1.03895	0.674949	0.0647862		0	0	0	0	0	0	1	0	0	0	0	1
Ccdc53	6	-0.380782	-0.913169	0.565957	0.160842		0	0	0	0	0	0	0	0	0	0	0	0
Zfp111	6	-0.586979	-1.28341	0.700411	0.137804		0	0	0	0	0	0	0	0	0	0	0	0
Tarsl2	5	-0.407225	-0.802364	0.567551	0.394937		0	0	0	0	0	0	0	0	0	0	0	0
Slc4a1	5	-2.27607	-3.44104	2.54322	2.55225		0	0	0	0	0	0	0	0	0	0	0	0
Rassf8	5	-0.632867	-0.978719	0.782239	0.640933		0	0	0	0	0	0	0	0	0	0	0	0
Arrdc4	5	-1.31057	-2.17416	1.22147	1.48439		0	0	0	0	0	0	0	0	0	0	1	1
Hbb-b1	5	-3.25604	-3.78764	2.51815	2.62901		0	0	0	0	0	0	0	0	0	0	0	0
Casp3	5	-0.458079	-0.741127	0.370013	0.592925		0	0	0	1	0	0	0	0	0	0	0	1
Stfa3	5	-1.32623	-2.41427	1.3778	1.64253		0	0	0	1	0	0	0	0	0	0	0	1
Klrc1	5	-0.831405	-1.18689	1.29398	1.34877		0	0	0	0	0	0	0	0	0	0	0	0
Ctsf	5	-0.393922	-0.682934	0.579567	0.592192		0	0	0	0	0	0	0	0	0	0	1	1
Rab30	5	-0.565302	-0.565302	0.708763	0.506246		0	0	0	0	0	0	0	0	0	0	0	0
4930430F08Rik	5	-0.101056	-0.573854	0.824829	0.613736		0	0	0	0	0	0	0	0	0	0	0	0
Ryk	5	-0.297733	-0.603498	0.6886	0.422501		0	0	0	0	0	0	0	0	0	0	0	0
Tfrc	5	-0.0415042	-0.747927	0.681467	0.544328		0	0	0	1	1	0	0	1	1	0	1	5
Fn3krp	5	-0.364156	-0.831888	0.500792	0.624235		0	0	0	0	0	0	0	0	0	0	0	0
Bglap	5	-0.174803	-0.652398	0.531928	0.875903		0	0	0	0	0	0	0	0	0	0	0	0
Gm15760	5	-0.288402	-0.762449	0.696309	1.09729		0	0	0	0	0	0	0	0	0	0	0	0
Lysmd2	5	-0.470683	-0.831686	0.913538	1.3261		0	0	0	0	0	0	0	0	0	0	0	0
ENSMUSG00000076741	5	-0.330281	-1.28255	1.56256	1.95492		0	0	0	0	0	0	0	0	0	0	0	0
Cd86	5	-0.347672	-1.46021	0.46485	1.20489		0	0	0	1	0	0	0	0	0	0	0	1
Pcbd1	5	-0.110553	-1.19768	0.579133	0.875705		0	0	0	0	0	0	0	0	0	0	0	0
Sec14l2	5	-0.899893	-1.92541	1.33134	1.72011		0	0	0	0	0	0	0	0	0	0	0	0
Popdc2	5	-0.929424	-1.89276	1.58972	2.02245		0	0	0	0	0	0	0	0	0	0	0	0
Apol7e	5	-0.423319	-0.826361	0.757015	0.770313		0	0	0	0	0	0	0	0	0	0	0	0
Iglc2	5	-0.934995	-1.38206	1.39263	1.59314		0	0	0	0	0	0	0	0	0	0	0	0
Gimap5	5	-0.730808	-1.00369	0.548189	1.11739		0	0	0	0	0	0	0	0	0	0	0	0
Pde5a	5	-0.484082	-0.760266	0.49413	0.75287		0	0	0	0	0	0	1	0	0	0	0	1
Nckap1	5	-0.878138	-1.51359	0.757956	1.01077		0	0	0	0	0	0	0	0	0	0	0	0
Ctsw	5	-0.578068	-1.11566	0.817491	1.12647		0	0	0	0	0	0	0	0	0	0	0	0
Ptprr	5	-0.324267	-0.94212	0.913078	0.992979		0	0	0	0	0	0	0	0	0	0	0	0
Gm12953	5	-0.330799	-1.38007	1.10679	1.04607		0	0	0	0	0	0	0	0	0	0	0	0
Hmbs	5	-0.567021	-0.624733	0.752748	0.759916		0	0	0	1	0	0	0	0	0	0	0	1
Fn1	5	-0.630702	-0.660591	0.638089	0.818734		0	0	0	0	0	1	0	0	0	0	1	2
Gm14296	5	-0.421862	-0.493481	0.566409	0.704174		0	0	0	0	0	0	0	0	0	0	0	0
Tspan13	5	-0.808483	-1.01245	0.734359	0.775348		0	0	0	0	0	0	0	0	0	0	1	1
Sytl4	5	-0.656012	-0.719598	0.714663	0.809898		0	0	0	0	0	0	0	0	0	0	0	0
Pkhd1l1	5	-0.570252	-0.614617	0.660369	0.724631		0	0	0	0	0	0	0	0	0	0	0	0
Trbc1	5	-1.86689	-1.86689	2.10736	2.57141		0	0	0	0	0	0	0	0	0	0	0	0
Gypa	5	-2.72499	-3.03497	2.34532	2.3506		0	0	0	0	0	0	0	0	0	0	0	0
Cd59a	5	-1.21	-1.11201	0.981533	0.976887		0	0	0	0	0	0	0	0	0	0	0	0
Slc6a20a	5	-1.03149	-1.03149	0.991008	0.827305		0	0	0	0	0	0	0	0	0	0	0	0
Ccne1	5	-0.782116	-0.853126	0.610133	0.617223		0	0	0	1	0	0	0	0	0	0	0	1
Tspan8	5	-2.21164	-2.21164	1.81783	1.80594		0	0	0	0	0	0	0	0	0	0	0	0
Sptb	5	-1.51065	-2.14551	1.63106	1.60628		0	0	0	0	0	0	0	0	0	0	0	0
Vldlr	5	-0.5762	-0.558898	0.644889	0.422554		0	1	0	1	0	0	0	0	0	0	0	2
Uros	5	-0.90261	-0.925831	1.07235	0.669036		0	0	0	0	0	0	0	0	0	0	0	0
Tspan6	5	-1.12412	-1.10358	0.854644	0.871234		0	0	0	0	0	0	0	0	0	0	0	0
Klra7	5	-1.97036	-2.16386	1.80674	1.72254		0	0	0	0	0	0	0	0	0	0	0	0
2210013O21Rik	5	-1.58716	-1.86416	1.35442	1.69545		0	0	0	0	0	0	0	0	0	0	0	0
Adcy6	5	-0.790316	-0.898551	0.856934	0.858536		0	0	0	0	0	0	0	0	0	0	0	0
Dntt	5	-2.21605	-2.10703	1.97592	1.96282		0	0	0	1	0	0	0	0	0	0	0	1
AV039307	5	-0.640362	-0.640362	0.686471	0.59765		0	0	0	0	0	0	0	0	0	0	0	0
Slc38a5	5	-2.06876	-2.35067	1.72209	1.72237		0	0	0	0	0	0	0	0	0	0	0	0
Hook1	5	-0.596218	-0.9042	0.776127	0.729516		0	0	0	0	0	0	0	0	0	0	0	0
Pfkm	5	-0.342395	-0.571155	0.661812	0.691379		0	0	0	1	0	0	0	0	0	0	0	1
Oas1a	5	-0.896575	-1.10256	1.33114	1.42597		0	0	0	0	0	0	0	0	0	0	0	0
1300017J02Rik	5	-1.30665	-1.17528	0.730407	1.46325		0	0	0	0	0	0	0	0	0	0	0	0
Tmem120b	5	-0.855672	-0.680657	0.363958	0.77682		0	0	0	1	0	0	0	0	0	0	0	1
Slc46a3	5	-1.16909	-0.766026	0.476032	0.97573		0	0	0	0	0	0	0	0	0	0	0	0
Rsph9	5	-0.53974	-0.533412	0.402709	0.794398		0	0	0	0	0	0	0	0	0	0	0	0
Cd200	5	-0.73326	-0.590584	0.526378	0.689917		0	0	0	0	0	0	0	0	0	0	0	0
2310022B05Rik	5	-0.967677	-0.717163	0.727257	0.867439		0	0	0	1	0	0	0	0	0	0	0	1
Gdpd1	5	-0.566609	-0.439629	0.563546	0.637015		0	0	0	0	0	0	0	0	0	0	0	0
Epb4.2	5	-2.7238	-1.79597	2.87026	3.29242		0	0	0	0	0	0	0	0	0	0	0	0
Dennd2c	5	-0.675133	-0.418275	0.526193	0.75291		0	0	0	1	0	0	0	0	0	0	0	1
Pdzk1ip1	5	-0.810557	-0.495805	0.973205	0.887253		0	0	0	0	0	0	0	0	0	0	0	0
6030468B19Rik	5	-0.506063	-0.506063	0.889548	0.85025		0	0	0	0	0	0	0	0	0	0	0	0
Armcx2	5	-0.570953	-0.515946	0.962228	1.13698		0	0	0	0	0	0	0	0	0	0	1	1
Tcf7	5	-0.809222	-0.808004	1.40759	1.57554		0	0	0	0	0	0	0	0	0	0	0	0
Cpox	5	-0.905527	-0.880742	1.37834	1.47071		0	0	0	0	0	0	0	0	0	0	0	0
Tom1l1	5	-1.25274	-1.60528	2.20644	2.27644		0	0	0	0	0	0	0	0	0	0	0	0
Klra8	5	-1.75053	-1.632	2.73801	2.50451		0	0	0	0	0	0	0	0	0	0	0	0
Ncr1	5	-1.39013	-1.71826	2.36511	2.42433		0	0	0	0	0	0	0	0	0	0	0	0
Sox6	5	-0.630692	-0.725102	1.01314	1.03873		0	0	0	0	0	0	0	0	0	0	0	0
Epb4.9	5	-0.909594	-1.00233	1.20693	1.11666		0	0	0	0	0	0	0	0	0	0	0	0
Oas1g	5	-1.08502	-1.29537	1.65742	1.50271		0	0	0	0	0	0	0	0	0	0	0	0
Kctd12b	5	-0.428684	-0.394429	0.710382	0.695039		0	0	0	0	0	0	0	0	0	0	0	0
Robo4	5	-0.415026	-0.404914	0.75026	0.731661		0	0	0	0	0	0	0	0	0	0	0	0
Fam46c	5	-0.959298	-0.870973	1.15422	1.13204		0	0	0	1	0	0	0	0	0	0	0	1
Klra4	5	-1.15564	-1.15564	1.63682	1.50005		0	0	0	0	0	0	0	0	0	0	0	0
Slc44a1	5	-0.615878	-0.631876	1.18088	0.906566		1	0	0	1	0	0	0	0	0	0	0	2
Grb10	5	-0.717072	-1.4615	1.92687	1.99641		0	0	0	0	0	0	1	0	0	0	0	1
Fam109b	5	-0.659444	-1.34201	1.77342	1.70373		0	0	0	0	0	0	0	0	0	0	0	0
Egfl7	5	-0.603826	-1.21641	1.30394	1.13232		0	0	0	0	0	0	0	0	0	0	0	0
Pygm	5	-0.304085	-0.615026	0.921487	0.65368		0	0	0	0	0	0	0	0	0	0	0	0
Eng	5	-0.439123	-0.82898	1.1339	1.44711		0	0	0	0	1	0	0	0	1	0	1	3
Gm5483	5	-0.954288	-1.30508	2.57212	2.33539		0	0	0	0	0	0	0	0	0	0	0	0
Tnfrsf9	5	-0.278143	-0.325176	0.907487	0.783508		0	0	0	1	0	0	0	0	0	0	0	1
Klra9	5	-0.65159	-0.755824	2.29021	1.94947		0	0	0	0	0	0	0	0	0	0	0	0
Samd3	5	-0.268755	-0.34383	1.21927	0.959407		0	0	0	0	0	0	0	0	0	0	0	0
Gimap3	5	-0.596298	-0.49326	1.24741	1.10613		0	0	0	0	0	0	0	0	0	0	0	0
Gp1ba	5	-0.440503	-0.500363	1.09467	0.987317		0	0	0	0	0	0	0	0	0	0	0	0
Ptk2	5	-0.353617	-0.330029	0.744316	0.682107		0	0	0	0	0	0	0	0	0	0	0	0
Gimap8	5	-0.532064	-0.460295	1.14929	1.26482		0	0	0	0	0	0	0	0	0	0	0	0
Il2rb	5	-0.752633	-0.791384	2.14314	2.24749		0	0	0	1	0	0	0	0	0	0	0	1
Yes1	5	-0.335798	-0.361884	1.12206	1.02055		0	0	0	0	0	0	0	0	0	0	0	0
Arhgef12	5	-0.285113	-0.248467	1.19172	1.11082		0	0	0	0	0	0	0	0	0	0	0	0
Gm867	5	-0.31025	-0.31025	1.18241	1.1236		0	0	0	0	0	0	0	0	0	0	0	0
Plekha8	5	-0.297955	-0.298415	0.910951	0.816307		0	0	0	0	0	0	0	0	0	1	1	2
Igkv1-115	5	-1.11563	-0.639686	2.62652	2.30141		0	0	0	0	0	0	0	0	0	0	0	0
Skap1	5	-0.562813	-0.734532	1.50853	1.37785		0	0	0	0	0	0	0	0	0	0	0	0
Trac	5	-0.508563	-0.696792	1.39242	1.30739		0	0	0	0	0	0	0	0	0	0	0	0
Fam19a4	5	-0.60044	-0.858076	1.47109	1.56024		0	0	0	0	0	0	0	0	0	0	1	1
Clca1	5	-0.318705	-0.420865	0.742888	0.787707		0	0	0	0	0	0	0	0	0	0	0	0
Igkc	5	-0.74281	-1.23713	2.04019	2.10201		0	0	0	0	0	0	0	0	0	0	0	0
Pabpc4	5	-0.222077	-0.490283	1.07388	1.01436		0	0	0	1	0	0	0	0	0	0	0	1
Lck	5	-0.388621	-0.712602	1.51465	1.51073		0	0	0	1	0	0	0	0	0	0	1	2
Klrb1c	5	-0.409846	-1.06976	2.11989	2.36699		0	0	0	1	0	0	0	0	0	0	0	1
Trim2	5	-0.154156	-0.309756	0.868139	0.770198		0	0	0	0	0	0	0	0	0	0	0	0
Ccr2	5	-0.286368	-0.659441	1.78651	1.76511		0	0	0	0	0	0	0	0	0	0	0	0
March3	5	-0.217931	-0.534455	1.44588	1.44741		0	0	0	1	0	0	0	0	0	0	0	1
Car3	5	-0.289081	-0.677749	1.62377	1.69657		0	0	0	0	0	0	0	0	0	0	0	0
Prkcq	5	-0.0649405	-0.408663	0.848067	1.07192		0	0	0	1	0	0	1	0	0	0	0	2
C1qtnf6	5	-0.322072	-0.327219	1.06788	1.17376		0	0	0	0	0	0	0	0	0	0	0	0
Sdpr	5	-0.230266	-0.288346	1.05056	1.21935		0	0	1	0	0	0	0	0	0	0	0	1
Clec9a	5	-0.317458	-0.326298	1.1645	1.0411		0	0	0	0	0	0	0	0	0	0	0	0
Slc14a1	5	-0.373982	-0.599634	0.873386	0.801581		0	0	0	0	0	0	0	0	0	0	0	0
Fn3k	5	-0.208902	-0.529624	0.913993	0.848331		0	0	0	0	0	0	0	0	0	0	0	0
Ufsp1	5	-0.121289	-0.547665	0.875838	0.679838		0	0	0	0	0	0	0	0	0	0	0	0
Ccl5	5	-0.227803	-0.857384	1.64852	1.31476		0	0	0	0	0	0	1	0	0	0	0	1
Tgm2	5	-0.259819	-0.633028	1.38569	1.28846		0	0	0	1	0	0	0	0	0	0	0	1
Chchd7	5	-0.0310547	-0.553736	0.688516	0.730705		0	0	0	0	0	0	0	0	0	0	1	1
Dnaja4	5	-0.384226	-0.559361	1.20962	0.665994		0	0	0	0	0	0	0	0	0	0	0	0
Grap	5	-0.476061	-0.565443	2.50951	1.6514		0	0	0	1	0	0	0	0	0	0	0	1
Cxcr3	5	-0.380513	-0.38225	1.31911	0.808512		0	0	0	0	0	0	0	0	0	0	0	0
Myl10	5	-1.09662	-1.01227	1.83145	1.10795		0	0	0	0	0	0	0	0	0	0	0	0
Ctla2b	5	-0.277753	-0.965516	0.924174	0.643539		0	0	0	0	0	0	0	0	0	0	0	0
Klrb1b	5	-0.501801	-0.480654	1.38508	0.353289		0	0	0	1	0	0	0	0	0	0	0	1
ENSMUSG00000076827	5	-0.744661	-0.744661	1.17069	0.210431		0	0	0	0	0	0	0	0	0	0	0	0
Aplp2	5	-0.423957	-0.238179	0.72548	0.859309		0	0	0	1	0	0	0	0	0	0	0	1
Klrc3	5	-0.220697	-0.220697	0.826618	1.0846		0	0	0	0	0	0	0	0	0	0	0	0
Als2cl	5	-0.233051	-0.273655	0.718642	1.02696		0	0	0	0	0	0	0	0	0	0	0	0
Hbq1b	5	-0.434299	-0.434299	1.09782	1.50213		0	0	0	0	0	0	0	0	0	0	0	0
Derl3	5	-0.302319	-0.31098	0.531973	0.906235		0	0	0	0	0	0	0	0	0	0	1	1
Gp9	5	-0.555891	-0.321417	0.616234	1.02701		0	0	0	0	0	0	0	0	0	0	0	0
2700081L22Rik	5	-0.448074	-0.368023	0.607382	0.9909		0	0	0	0	0	0	0	0	0	0	0	0
Ighg3	5	-0.561874	-1.11029	1.49198	2.08392		0	0	0	0	0	0	0	0	0	0	0	0
Rragb	5	-0.605852	-0.717663	0.689812	1.14901		0	0	0	0	0	0	0	0	0	0	1	1
Klra14	5	-0.512405	-0.512405	0.363562	1.04629		0	0	0	0	0	0	0	0	0	0	0	0
Rap1gap	5	-0.398967	-0.398967	0.549822	1.45525		0	0	0	0	0	0	0	0	0	0	0	0
Gm4955	5	-0.0984156	-0.471645	0.581189	1.16562		0	0	0	0	0	0	0	0	0	0	0	0
F11r	5	0.0208865	-0.607782	0.637267	1.34169		0	0	0	0	0	0	0	0	0	0	0	0
Mrvi1	5	-0.356836	-0.249358	0.666808	0.860794		0	0	0	0	0	0	0	0	0	0	0	0
Zfp248	5	-0.75981	-0.644231	0.943805	1.07067		0	0	0	0	0	0	0	0	0	0	0	0
Apol8	5	-0.728112	-0.656146	1.2644	1.31146		0	0	0	1	0	0	0	0	0	0	0	1
Pla2g4c	5	-0.601001	-0.333998	0.700883	0.672857		0	0	0	0	0	0	0	0	0	0	0	0
Gimap4	5	-1.07499	-0.434063	1.61524	1.60785		0	0	0	0	0	0	0	0	0	0	0	0
Tmod1	5	-0.782836	-0.293904	1.22132	1.02095		0	0	0	0	0	0	0	0	0	0	0	0
Ighj3	5	-1.83891	-1.0339	3.1914	3.0555		0	0	0	0	0	0	0	0	0	0	0	0
Stfa2l1	5	-1.05147	-0.53427	1.33048	1.36193		0	0	0	0	0	0	0	0	0	0	0	0
Cd2	5	-0.772067	-0.38941	0.9925	0.937992		0	0	0	0	0	0	0	0	0	0	0	0
BC100530	5	-2.11154	-0.799424	3.00568	2.63163		0	0	0	0	0	0	0	0	0	0	0	0
4930524O07Rik	5	-0.440366	-0.440366	0.719979	0.570944		0	0	0	0	0	0	0	0	0	0	0	0
Gimap7	5	-0.337153	-0.272069	1.43423	0.928999		0	0	0	0	0	0	0	0	0	0	0	0
Slc2a4	5	-0.664068	-0.459931	1.89085	1.45324		0	0	0	0	0	0	0	0	0	0	1	1
Clec7a	5	-0.737123	-0.593985	0.546486	0.446953		0	0	0	0	0	0	0	0	0	0	0	0
Slc22a23	5	-1.06526	-0.613466	0.714016	1.06145		0	0	0	0	0	0	0	0	0	0	0	0
8430419L09Rik	5	-1.15975	-0.720996	0.873253	0.983748		0	0	0	0	0	0	0	0	0	0	0	0
Cdc42bpa	5	-1.11556	-0.702102	0.599731	1.18724		0	0	0	1	0	0	0	0	0	0	0	1
Agpat3	5	-0.831424	-0.150597	0.705708	0.698222		0	0	0	0	0	0	0	0	0	0	1	1
Phka1	5	-0.631586	-0.14104	0.697879	0.903927		0	0	0	0	0	0	0	0	0	0	0	0
Klra3	5	-0.770519	-0.305897	0.724204	1.33951		0	0	0	0	0	0	0	0	0	0	0	0
Brdt	5	-0.696058	-0.284755	0.343318	1.03981		0	0	0	0	0	0	0	0	0	0	0	0
Clec4a1	5	-0.952901	-0.208457	0.742778	0.666355		0	0	0	0	0	0	0	0	0	0	0	0
Hmgn3	5	-1.5714	-0.396031	0.88655	0.881477		0	0	0	0	0	0	0	0	0	0	0	0
Lefty1	5	-1.15644	-0.271444	0.695382	0.491246		0	0	0	0	0	0	0	0	0	0	0	0
Gm3345	5	-0.787957	-0.458116	0.594218	0.404351		0	0	0	0	0	0	0	0	0	0	0	0
Itsn1	5	-1.38341	-0.354089	1.00307	0.42845		0	0	0	0	0	0	0	0	0	0	1	1
Otub2	5	-0.699341	-0.87486	0.874757	0.775283		0	0	0	0	0	0	0	0	0	0	0	0
Gm13150	5	-1.15732	-1.15732	1.06429	1.39464		0	0	0	0	0	0	0	0	0	0	0	0
Tmem246	5	-0.385736	-0.38947	0.919879	1.00268		0	0	0	0	0	0	0	0	0	0	0	0
Trbj1-5	5	-1.82332	-1.82332	4.7324	4.13632		0	0	0	0	0	0	0	0	0	0	0	0
Stfa2	5	-0.783222	-0.579127	1.70226	1.08294		0	0	0	0	0	0	0	0	0	0	0	0
Gm11522	5	-1.08073	-1.08073	2.53067	1.4084		0	0	0	0	0	0	0	0	0	0	0	0
Entpd1	5	-0.392277	-0.243572	0.531621	1.09747		0	0	0	0	0	0	0	0	0	0	0	0
Trbj2-1	5	-1.82332	-1.82332	3.03078	4.71353		0	0	0	0	0	0	0	0	0	0	0	0
1700023L04Rik	5	-0.770162	-0.70478	0.188003	0.957045		0	0	0	0	0	0	0	0	0	0	0	0
ENSMUSG00000051949	5	-1.08434	-1.08434	1.2522	1.08434		0	0	0	0	0	0	0	0	0	0	0	0
ENSMUSG00000076660	5	-1.84175	-0.527621	1.7719	2.01702		0	0	0	0	0	0	0	0	0	0	0	0
Arhgap12	5	-0.741485	-0.350076	1.09162	1.323		0	0	0	1	0	0	0	0	0	0	0	1
Cped1	5	-0.578616	-0.536346	1.10389	0.630137		0	0	0	0	0	0	0	0	0	0	0	0
Tmem98	5	-0.362574	-0.528145	0.745203	0.412809		0	0	0	0	0	0	0	0	0	0	0	0
Dhrs11	5	-0.467585	-0.649878	0.616884	0.404237		0	0	0	1	0	0	0	0	0	0	0	1
Thnsl2	5	-0.385634	-0.463518	0.598654	0.617969		0	0	0	0	0	0	0	0	0	0	0	0
Tmem41a	5	-0.388749	-0.450056	0.94795	0.989171		0	0	0	0	0	0	0	0	0	0	0	0
Gm13245	5	-0.603893	-0.603893	0.93304	0.958733		0	0	0	0	0	0	0	0	0	0	0	0
Trbj1-1	5	-2.09549	-2.09549	4.47478	3.68925		0	0	0	0	0	0	0	0	0	0	0	0
Ddx60	5	-0.567693	-0.774319	0.458387	0.606471		0	0	0	0	0	0	0	0	0	0	0	0
Ntn4	5	-0.322707	-1.2255	1.12566	1.01298		0	0	0	0	0	0	0	0	0	0	0	0
Tlr7	5	-0.139199	-0.93719	1.07045	0.957088		0	0	0	0	0	0	0	0	0	0	0	0
Igkv4-69	5	-0.209522	-1.0978	1.72451	1.50575		0	0	0	0	0	0	0	0	0	0	0	0
Hist3h2ba	5	-0.151635	-0.660606	1.01555	0.706788		0	0	0	0	0	0	0	0	0	0	0	0
Ifi204	5	-0.113469	-0.662061	0.789473	0.465625		0	0	0	0	0	0	0	0	0	0	0	0
Cyb5d2	5	-0.302506	-0.643512	0.716639	0.822868		0	0	0	0	0	0	0	0	0	0	0	0
Ubac1	5	-0.297688	-0.34116	0.936401	1.01558		0	0	0	0	0	0	0	0	0	0	0	0
Gm12655	5	-0.268995	-0.441905	0.392501	0.899397		0	0	0	0	0	0	0	0	0	0	0	0
Tspan17	5	-1.17282	-0.21323	0.631439	0.376324		0	0	0	0	0	0	0	0	0	0	0	0
Gm11863	5	-1.71143	-0.550035	1.42947	0.550035		0	0	0	0	0	0	0	0	0	0	0	0
Gm16021	5	-0.634496	-0.634496	0.634496	0.94281		0	0	0	0	0	0	0	0	0	0	0	0
Gm15744	5	-0.522134	-0.522134	0.674316	0.522134		0	0	0	0	0	0	0	0	0	0	0	0
Lepr	5	-0.707766	-0.534965	1.04672	0.799941		0	0	0	0	0	0	0	0	0	0	0	0
Tmem191c	5	-0.306004	-0.474249	0.82474	0.425184		0	0	0	0	0	0	0	0	0	0	0	0
Rabl2	5	-0.52795	-1.13166	2.43687	0.860173		0	0	0	0	0	0	0	0	0	0	0	0
Tnfrsf17	4	-0.147701	-0.281043	1.01801	0.696234		0	0	0	0	0	0	0	0	0	0	0	0
Ehd3	4	-0.153962	-0.238871	1.35779	1.10178		0	0	0	0	0	0	0	0	0	0	0	0
Leprel4	4	-0.124577	-0.168142	1.3211	1.01451		0	0	0	0	0	0	0	0	0	0	1	1
Eomes	4	-0.136842	-0.149567	1.07436	0.930935		0	0	0	0	0	0	0	0	0	0	1	1
Ifit1	4	-0.131124	-0.128446	0.985743	0.872224		0	0	0	0	0	0	0	0	0	0	0	0
Igkv4-71	4	-0.26792	-0.809412	2.96187	2.62614		0	0	0	0	0	0	0	0	0	0	0	0
Itgax	4	-0.082434	-0.200704	0.829303	0.917087		0	0	0	0	0	0	0	0	0	0	0	0
Rps15a-ps5	4	-0.194118	-0.194118	2.81453	2.66746		0	0	0	0	0	0	0	0	0	0	0	0
Klra13-ps	4	-0.242052	-0.205175	2.40412	2.29467		0	0	0	0	0	0	0	0	0	0	0	0
Klre1	4	-0.176342	-0.0966204	1.98459	1.80142		0	0	0	0	0	0	0	0	0	0	0	0
Acp5	4	-0.306909	-0.172676	1.88381	2.01744		0	0	0	1	0	0	0	0	0	0	0	1
Igkj1	4	-0.541076	-0.30403	2.66713	2.81869		0	0	0	0	0	0	0	0	0	0	0	0
Ptger3	4	-0.206645	-0.246713	1.1993	1.26679		0	0	0	1	0	0	0	0	0	0	0	1
Ighg2b	4	-1.12741	-0.493579	3.46136	3.49		0	0	0	0	0	0	0	0	0	0	0	0
ENSMUSG00000067480	4	-0.762879	-0.0885912	1.43236	1.09373		0	0	0	0	0	0	0	0	0	0	0	0
Klri2	4	-0.174119	-0.0430131	1.18453	1.24414		0	0	0	0	0	0	0	0	0	0	0	0
Darc	4	-0.196541	-0.0172732	1.80443	1.92016		0	0	0	0	0	0	0	0	0	0	0	0
Klrb1a	4	-0.210144	-0.105628	1.93433	2.02846		0	0	0	0	0	0	0	0	0	0	0	0
Igf2bp3	4	-0.270468	-0.417475	3.13022	3.16586		0	0	0	1	0	0	0	0	0	0	1	2
Gipc2	4	-0.0218861	-0.0218861	1.39163	1.47608		0	0	0	0	0	0	0	0	0	0	0	0
Capn11	4	0	0	1.57429	1.72472		0	0	0	0	0	0	0	0	0	0	0	0
Oxtr	4	0.0478535	-0.0478535	4.56828	4.68044		0	0	0	0	0	0	0	0	0	0	0	0
P2ry14	4	0.0357909	-0.0357909	1.61718	1.68048		0	0	0	0	0	0	0	0	0	0	0	0
Gucy1b3	4	0.0230656	-0.0294338	1.21109	1.30416		0	0	0	0	0	0	0	0	0	0	0	0
Treml1	4	0.0177111	-0.0177111	1.39999	1.30994		0	0	0	0	0	0	0	0	0	0	0	0
Igj	4	-0.276795	0.0751029	3.11105	3.28589		0	0	0	0	0	0	0	0	0	0	0	0
Ammecr1	4	-0.0612309	-0.0223679	0.98853	0.983892		0	0	0	0	0	0	0	0	0	0	0	0
Hopx	4	-0.279962	-0.174909	2.32652	2.30359		0	0	0	1	0	0	0	0	0	0	0	1
Klra1	4	-0.156703	-0.102797	1.48062	1.26443		0	0	0	0	0	0	0	0	0	0	0	0
Gm4956	4	-0.0677129	-0.0677129	0.985266	0.905735		0	0	0	0	0	0	0	0	0	0	0	0
4931406C07Rik	4	0	0	1.51336	1.21196		0	0	0	1	0	0	0	0	0	0	0	1
Met	4	-0.0515221	0.0515221	1.5509	1.31739		0	0	0	0	0	0	0	0	0	0	1	1
Oas1b	4	-0.114963	0.114962	1.9293	1.77895		0	0	0	0	0	0	0	0	0	0	0	0
Metap2	4	-0.0398585	0.0398585	1.11614	1.07474		0	0	0	0	0	0	0	0	0	0	0	0
Plek2	4	-0.117825	0.0282173	2.17437	1.96597		0	0	0	1	0	0	0	0	0	0	0	1
Socs2	4	0.0929994	-0.276738	1.77317	1.97066		0	1	0	0	0	0	0	0	0	0	0	1
Ccl4	4	-0.0913368	-0.080743	0.904164	1.1597		1	0	0	0	0	0	0	0	0	0	0	1
Gprc5b	4	-0.354484	-0.0295305	1.09309	1.26863		0	0	0	0	0	0	0	0	0	0	0	0
Sh2d1a	4	-0.714492	-0.228137	2.09945	2.49757		0	0	0	1	0	0	0	0	0	0	0	1
Ssx2ip	4	-0.206689	-0.0726043	0.800544	1.00002		0	0	0	0	0	0	0	0	0	0	0	0
Dnajb4	4	-0.360264	-0.0774746	0.883366	0.839513		0	0	0	1	0	0	0	0	0	0	1	2
Ifitm7	4	-0.470149	-0.0578144	1.08616	1.28963		0	0	0	1	0	0	0	0	0	0	0	1
Gp5	4	-0.306828	-0.378342	1.49936	1.53144		0	0	0	0	0	0	0	0	0	0	0	0
Minpp1	4	-0.291198	-0.0240216	1.05969	1.25685		0	0	0	1	0	0	0	0	0	0	0	1
Fabp5	4	-0.0769737	-0.0887473	1.10112	1.21512		0	0	0	1	0	0	0	0	0	0	0	1
Plvap	4	-0.156558	-0.152836	1.00018	1.03659		0	0	0	0	0	0	0	0	0	0	0	0
Clcn2	4	-0.35457	-0.0765451	1.81893	1.82989		0	0	0	0	0	0	0	0	0	0	1	1
Gm6954	4	0	0	0.9942	1.435		0	0	0	0	0	0	0	0	0	0	0	0
Klrc2	4	-0.280022	0.0338723	0.812227	1.35848		0	0	0	0	0	0	0	0	0	0	0	0
Gm12839	4	-0.130829	-0.130829	0.769445	1.1472		0	0	0	0	0	0	0	0	0	0	0	0
Cd3g	4	-0.507229	-0.135226	1.61736	2.46852		0	0	0	0	0	0	0	0	0	0	0	0
Ttc4	4	-0.616423	0.119874	1.20618	1.28438		0	0	0	0	0	0	0	0	0	0	0	0
Ptdss2	4	-0.54931	-0.00163783	0.968373	0.919154		0	0	0	0	0	0	0	0	0	0	0	0
Adipoq	4	-0.147884	-0.3133	0.808888	1.23683		0	0	0	0	0	0	0	0	0	0	0	0
Trbc2	4	-0.702418	-0.250386	0.692599	1.78048		0	0	0	0	0	0	0	0	0	0	0	0
Hif3a	4	0.208983	-0.345572	1.73795	1.86841		0	0	0	1	0	0	0	0	0	0	0	1
Hsd17b14	4	0.0756543	-0.128325	1.1323	1.04047		0	0	0	0	0	0	0	0	0	0	0	0
Tubb1	4	0.218501	-0.260587	1.8592	1.84264		0	0	0	0	0	0	0	0	0	0	0	0
Ighj4	4	0.0102085	-2.11635	4.88108	5.06182		0	0	0	0	0	0	0	0	0	0	0	0
Mllt3	4	0.0793559	-0.58514	1.71315	1.77533		0	0	0	1	0	0	0	0	0	0	0	1
Sfrp4	4	-0.046363	-0.266924	0.944336	1.02867		0	0	0	0	0	0	0	0	0	0	0	0
Ighj1	4	-0.0119247	-0.85412	1.73995	1.99412		0	0	0	0	0	0	0	0	0	0	0	0
Slc6a9	4	-0.0885951	-0.614419	1.49531	1.40565		0	0	0	0	0	0	0	0	0	0	0	0
Gkap1	4	-0.0124749	-0.252808	0.922816	0.835464		0	0	0	0	0	0	0	0	0	0	0	0
Gm17120	4	0.0172313	-0.332266	0.877118	1.31926		0	0	0	0	0	0	0	0	0	0	0	0
Igkj2	4	0.0592216	-0.989155	2.05201	2.39421		0	0	0	0	0	0	0	0	0	0	0	0
Gm15384	4	0.0752479	-0.540956	1.14035	1.34313		0	0	0	0	0	0	0	0	0	0	0	0
Dusp22	4	0.10711	-0.321543	1.28555	1.33338		0	0	0	1	0	0	0	0	0	0	0	1
Selp	4	0.0985779	-0.563126	1.07869	1.01029		0	0	0	0	0	0	0	0	0	0	0	0
Gm15726	4	0.0229904	-0.637713	0.983785	0.766722		0	0	0	0	0	0	0	0	0	0	0	0
2410066E13Rik	4	0.00468866	-0.345488	0.971384	0.761492		0	0	0	0	0	0	0	0	0	0	0	0
Ms4a6d	4	0.0280336	-0.413679	0.889559	0.832704		0	0	0	0	0	0	0	0	0	0	0	0
Kif24	4	0.152526	-0.619153	1.13773	1.37211		0	0	0	0	0	0	0	0	0	0	0	0
Ifi203	4	0.00484514	-0.551537	1.0088	0.657052		0	0	0	0	0	0	0	0	0	0	0	0
Lgalsl	4	-0.231601	-0.471448	0.989331	1.1417		0	0	0	0	0	0	0	0	0	0	0	0
Mgam	4	-0.0424147	-0.310407	0.890416	0.782297		0	0	0	0	0	0	0	0	0	0	0	0
Gm20520	4	-0.23689	-0.23689	1.34164	0.946933		0	0	0	0	0	0	0	0	0	0	0	0
Ccdc111	4	-0.333101	-0.164005	0.853779	0.847682		0	0	0	0	0	0	0	0	0	0	0	0
Cd83	4	-0.290359	-0.1245	0.856245	0.820455		1	0	0	1	0	0	0	0	0	0	0	2
Chi3l4	4	-0.404998	-0.253792	1.00707	1.37215		0	0	0	0	0	0	0	0	0	0	0	0
Gm14942	4	-0.132014	0.066583	1.24616	0.89693		0	0	0	0	0	0	0	0	0	0	0	0
Gpr174	4	0.0320888	-0.0548674	1.17173	0.822812		0	0	0	0	0	0	0	0	0	0	0	0
Gm6460	4	0	0	1.94082	1.19053		0	0	0	0	0	0	0	0	0	0	0	0
4933402N22Rik	4	0	0	1.5408	0.89441		0	0	0	0	0	0	0	0	0	0	0	0
Gm14219	4	0	0	1.69108	0.874622		0	0	0	0	0	0	0	0	0	0	0	0
Gm20441	4	-0.0611472	0.0611472	1.71835	0.766656		0	0	0	0	0	0	0	0	0	0	0	0
Cbs	4	-0.156515	-0.156515	1.68612	0.616703		0	0	0	1	0	0	0	0	0	0	0	1
Arhgap29	4	-0.0727232	-0.129948	1.45369	0.702081		0	0	0	0	0	0	0	0	0	0	0	0
Sbf2	4	-0.21091	-0.33243	1.40137	0.614603		0	0	0	0	0	0	1	0	0	0	1	2
Siglech	4	0.0886104	-0.0886104	2.66894	2.61026		0	0	0	0	0	0	0	0	0	0	0	0
Gm10482	4	0.081418	-0.081418	4.40905	4.56279		0	0	0	0	0	0	0	0	0	0	0	0
Usp18	4	-0.0424031	0.0424031	1.44796	1.48965		0	0	0	0	0	0	0	0	0	0	0	0
Ifi44	4	-0.0463485	0.0463485	1.57721	1.80032		0	0	0	0	0	0	0	0	0	0	0	0
Ighg1	4	-0.195366	0.195366	3.25806	2.89465		0	0	0	0	0	0	0	0	0	0	0	0
Ppap2b	4	-0.0938306	0.0938306	0.949897	1.21009		0	0	0	0	0	0	0	0	0	0	0	0
Nrp2	4	-0.138311	0.138311	1.49172	1.68774		0	0	0	0	0	0	0	0	0	0	0	0
Ptprm	4	-0.0785752	0.0785752	1.19638	1.25351		0	0	0	0	0	0	0	0	0	0	1	1
Prdx3	4	-0.0676587	0.0676587	0.969291	1.06535		0	0	0	0	0	0	0	0	0	0	0	0
Gas2l1	4	-0.211068	0.160081	1.45197	1.56117		0	0	0	1	0	0	0	0	0	0	0	1
Ighg2c	4	-0.242937	0.23347	4.59742	4.6052		0	0	0	0	0	0	0	0	0	0	0	0
Ppbp	4	-0.330855	0.172408	3.50817	3.72714		0	0	0	0	0	0	0	0	0	0	0	0
Alox12	4	-0.154791	0.127192	2.57275	2.72545		0	0	0	0	0	0	0	0	0	0	0	0
AU023871	4	-0.204814	0.110241	1.18508	1.37481		0	0	0	0	0	0	0	0	0	0	0	0
Clu	4	-0.568889	0.366487	2.0671	2.42336		0	0	0	0	0	0	0	0	0	0	0	0
Cd226	4	-0.330665	0.0879858	1.07036	1.44899		0	0	0	0	0	0	0	0	0	0	0	0
Dlg2	4	-0.244295	0.0411087	0.823637	1.00375		0	0	0	0	0	0	0	0	0	0	0	0
Penk	4	-0.628535	0.628535	2.80681	3.09797		0	0	0	0	0	0	0	0	0	0	0	0
Ctsk	4	-0.389738	0.389738	1.54736	1.95858		0	0	0	0	0	0	0	0	0	0	0	0
Casp12	4	-0.164167	0.164167	1.02239	0.988976		0	0	0	0	0	0	0	0	0	0	0	0
Alad	4	-0.425101	0.326196	1.33355	1.41685		0	0	0	0	0	0	0	0	0	0	0	0
Hmga2	4	0.143496	-0.143496	3.4149	3.44906		1	0	0	0	0	0	0	0	0	0	1	2
Cd74	4	0.0830723	-0.0830723	1.13983	1.07498		0	0	0	0	0	0	0	0	0	0	0	0
Col5a3	4	0.112314	-0.112314	1.16056	1.00485		0	0	0	1	0	0	0	0	0	0	0	1
Podxl	4	0.19788	-0.19788	1.7327	1.3732		0	0	0	0	0	0	0	0	0	0	0	0
Prg2	4	0.0774733	-0.0774733	1.39235	1.40027		0	0	0	0	0	0	0	0	0	0	0	0
Rpl5-ps1	4	0.185549	-0.185549	1.28918	1.25245		0	0	0	0	0	0	0	0	0	0	0	0
Nr1d2	4	0.11844	-0.11844	0.989996	1.10171		0	0	0	1	0	0	0	0	0	0	0	1
Fabp4	4	0.14518	-0.182266	1.23441	1.40423		0	0	0	0	0	0	0	0	0	0	0	0
Igfbp5	4	0.112717	-0.112717	1.61192	1.82864		0	1	0	0	0	0	0	0	0	0	0	1
Foxo1	4	0.188798	-0.221682	0.989964	1.03893		0	0	0	1	0	0	0	0	0	0	0	1
Gm9847	4	0.214176	-0.214176	1.24372	1.91552		0	0	0	0	0	0	0	0	0	0	0	0
Plagl1	4	0.432264	-0.432264	2.95832	2.92753		0	0	0	0	0	0	0	0	0	0	1	1
A830012C17Rik	4	0.398933	-0.398933	2.05552	2.16905		0	0	0	0	0	0	0	0	0	0	0	0
Pkib	4	0.273806	-0.273806	1.18216	1.24707		0	0	0	0	0	0	0	0	0	0	0	0
Tlr1	4	0.265164	-0.265164	1.21729	1.23064		0	0	0	0	0	0	0	0	0	0	0	0
Cxcl12	4	0.364224	-0.364224	1.32501	1.35214		0	1	0	0	1	0	0	0	0	0	0	2
Bgn	4	0.117958	-0.117958	1.23393	1.20443		0	0	0	0	0	0	0	0	0	0	0	0
Klrk1	4	0.429483	-0.469946	1.50052	1.14801		0	0	0	0	0	0	0	0	0	0	0	0
Serping1	4	0.459543	-0.459543	1.2352	1.08535		0	0	0	0	0	0	0	0	0	0	0	0
Pigq	4	-0.198682	0.0472143	1.00202	1.01022		0	0	0	0	0	0	0	0	0	0	0	0
Sparc	4	-0.0363546	0.0363546	1.21503	1.71863		0	0	0	0	0	0	0	0	0	0	0	0
Ccr5	4	-0.484985	-0.216851	1.67814	2.16172		1	0	0	0	0	0	0	0	0	0	0	1
Lrrc16a	4	-0.278638	-0.781271	0.853827	0.876283		0	0	0	0	0	0	0	0	0	0	0	0
Gm17709	4	-0.0310077	0.0310077	1.01934	1.03437		0	0	0	0	0	0	0	0	0	0	0	0
Ms4a4b	4	-0.0347578	0.0347578	1.28333	1.11663		0	0	0	0	0	0	0	0	0	0	0	0
Abca9	4	0.296894	-0.296894	1.29651	1.27664		0	0	0	0	0	0	0	0	0	0	0	0
Sdc1	4	0.314139	-0.314139	1.09804	1.16479		0	0	0	0	0	0	0	0	0	0	0	0
Gm6969	4	0.0589206	-0.0589206	0.951765	1.27605		0	0	0	0	0	0	0	0	0	0	0	0
C4b	4	0.202015	-0.202015	1.26063	1.4261		0	0	0	0	0	0	0	0	0	0	0	0
Klrd1	4	-0.107982	0.107982	1.70978	1.56745		0	0	0	0	0	0	0	0	0	0	0	0
Gm10184	4	-0.0295123	0.0295123	1.73874	1.58425		0	0	0	0	0	0	0	0	0	0	0	0
Tef	3	0.901155	1.54509	0.0657879	-0.0657879		0	0	0	0	0	0	0	0	0	0	1	1
9630013D21Rik	3	1.67697	1.54132	0.332787	-0.332787		0	0	0	0	0	0	0	0	0	0	0	0
Ccl9	3	1.06176	1.02729	0.0250549	-0.0250549		0	0	0	0	0	0	0	0	0	0	0	0
Rasgrf2	3	1.57894	1.76412	0.123005	-0.123005		0	0	0	0	0	0	0	0	0	0	1	1
Dio2	3	1.06134	1.3201	-0.0240331	0.0240331		0	0	0	0	0	0	0	0	0	0	0	0
Hs3st3b1	3	1.41468	1.30556	0.0566918	-0.0566918		0	0	0	0	0	0	0	0	0	0	0	0
Pld4	3	1.22868	0.84225	0.0122499	-0.0122499		0	0	0	0	0	0	0	0	0	0	0	0
Gm12811	3	1.66474	0.877106	0.0866083	-0.0866083		0	0	0	0	0	0	0	0	0	0	0	0
Ikzf2	3	1.29448	0.864642	0.000555057	-0.000555057		0	0	0	0	0	0	0	0	0	0	0	0
Gm7582	3	1.44405	0.91748	0.122523	-0.122523		0	0	0	0	0	0	0	0	0	0	0	0
Ank	3	1.72011	0.942268	0.126687	-0.126687		0	0	0	0	0	0	0	0	0	0	0	0
P2rx4	3	1.32881	1.04443	-0.00102986	0.00102986		0	0	0	0	0	0	0	0	0	0	0	0
Btbd11	3	1.30504	1.00453	-0.0301863	0.0301863		0	0	0	1	0	0	0	0	0	0	0	1
Emr1	3	1.70615	1.34739	0.0234991	-0.0234991		0	0	0	0	0	0	0	0	0	0	0	0
Ms4a6c	3	1.63264	1.01273	0.019635	-0.019635		0	0	0	0	0	0	0	0	0	0	0	0
Procr	3	1.42931	0.981023	0.0994401	-0.0994401		0	0	0	0	0	0	0	0	0	0	0	0
Cdkn2a	3	1.81581	1.28577	0.179849	-0.179849		0	0	0	0	0	0	0	0	0	0	0	0
Mapk12	3	1.90385	1.47385	0.062244	-0.062244		0	0	0	0	0	0	0	0	0	0	1	1
Hpse	3	1.62873	1.59058	0.096453	-0.096453		0	0	0	1	0	0	0	0	0	0	0	1
Itga1	3	1.32961	1.2416	-0.0263845	0.0263845		0	0	0	0	0	0	0	0	0	0	0	0
Apba1	3	1.00944	1.01045	0.0108101	-0.0108101		0	0	0	0	0	0	0	0	0	0	0	0
Gm21685	3	1.20431	1.1584	-0.0155286	0.0155286		0	0	0	0	0	0	0	0	0	0	0	0
Depdc7	3	1.72819	1.32314	-0.349196	0.349196		0	0	0	0	0	0	0	0	0	0	0	0
Prkce	3	1.08223	1.04346	-0.0729284	0.0729284		0	0	0	1	0	0	0	0	0	0	1	2
Chd3	3	1.12714	1.07788	0.00238994	-0.00238994		0	0	0	0	0	0	0	0	0	0	1	1
Slc35b4	3	1.36973	1.51829	-0.0721062	0.0721062		0	0	0	1	0	0	0	0	0	1	0	2
Ms4a4c	3	1.87993	1.58234	0.156474	-0.156474		0	0	0	0	0	0	0	0	0	0	0	0
Lat2	3	1.47531	1.23305	0.0547096	-0.0547096		0	0	0	0	0	0	0	0	0	0	0	0
Plekha1	3	1.27333	1.16658	-0.0701421	0.0701421		0	0	0	1	0	0	0	0	0	0	0	1
Serpinf1	3	1.05444	1.02256	-0.0323085	0.0323085		0	0	0	1	0	0	0	0	0	0	0	1
Prss16	3	1.23286	1.33848	-0.0216977	0.0216977		0	0	0	1	0	0	0	0	0	0	0	1
Kcne3	3	0.908974	1.21324	0.030416	-0.030416		0	0	0	0	0	0	0	0	0	0	0	0
Plekhg5	3	0.88786	1.27747	0.0898454	-0.0898454		0	0	0	0	0	0	0	0	0	0	0	0
Itgb7	3	0.96619	1.29906	0.0259585	-0.0259585		0	0	0	0	0	0	0	0	0	0	0	0
Rhbdl3	3	1.19305	1.59516	0.10866	-0.10866		0	0	0	0	0	0	0	0	0	0	0	0
Kcnk12	3	0.855082	1.2336	-0.12231	0.12231		0	0	0	0	0	0	0	0	0	0	0	0
Slc5a11	3	0.979399	1.33347	-0.221554	0.221554		0	0	0	0	0	0	0	0	0	0	0	0
Ly6e	3	1.20995	0.807166	-0.12309	0.12309		0	0	0	0	0	0	0	0	0	0	0	0
Iffo1	3	1.11205	1.02332	-0.0462016	0.0462016		0	0	0	0	0	0	0	0	0	0	0	0
Mn1	3	1.82063	1.61431	-0.0581696	0.0581696		0	0	0	0	0	0	0	0	0	0	0	0
Klrb1f	3	1.84199	1.61141	-0.0402801	0.0402801		0	0	0	0	0	0	0	0	0	0	0	0
Tlr12	3	1.8983	1.86172	-0.105255	0.105255		0	0	0	0	0	0	0	0	0	0	0	0
Afap1l1	3	1.53831	1.24585	-0.0515022	0.0515022		0	0	0	0	0	0	0	0	0	0	0	0
Ptprs	3	1.32705	1.38109	0.0133472	-0.0133472		0	0	0	1	0	0	0	0	0	0	1	2
Cpa3	3	3.60442	2.74343	-0.00140066	0.00140066		0	0	0	0	0	0	0	0	0	0	0	0
Gata2	3	1.06387	0.970064	0.0455765	-0.0455765		0	0	0	0	1	0	0	0	0	0	1	2
Mdga1	3	1.72218	1.34393	0.0994162	-0.0994162		0	0	0	0	0	0	0	0	0	0	0	0
Efcab4a	3	1.07193	1.32905	0.213188	-0.213188		0	0	0	0	0	0	0	0	0	0	0	0
Pcp4l1	3	1.39012	2.00948	0.126276	-0.126276		0	0	0	0	0	0	0	0	0	0	0	0
Lag3	3	1.15944	1.76515	0.115201	-0.115201		0	0	0	0	0	0	0	0	0	0	0	0
Bcl2l14	3	1.18805	1.01303	-0.162155	0.162155		0	0	0	1	0	0	0	0	0	0	0	1
Siglec5	3	1.82963	1.51797	-0.00217987	0.00217987		0	0	0	0	0	0	0	0	0	0	0	0
Gstm7	3	1.75922	1.54829	0.0515731	-0.0515731		0	0	0	0	0	0	0	0	0	0	0	0
Oosp1	3	3.56023	3.5133	0.0488983	-0.0488983		0	0	0	0	0	0	0	0	0	0	0	0
Nlrc4	3	1.42309	1.18481	0.0364432	-0.0364432		0	0	0	0	0	0	0	0	0	0	0	0
Egln3	3	2.00383	1.9288	-0.0227782	0.0227782		1	1	0	1	1	0	0	0	1	0	0	5
Nkx2-3	3	1.89452	1.77413	0.11785	-0.11785		0	0	0	0	0	0	0	0	0	0	1	1
Adamts9	3	1.05153	0.988892	0.115909	-0.115909		0	0	0	0	0	0	0	0	0	1	0	1
Arid5a	3	1.25796	1.48862	0.133938	-0.133938		0	0	0	1	0	0	0	0	0	0	1	2
Fam43a	3	1.04494	1.19852	0.0480175	-0.0480175		0	0	0	0	0	0	0	0	0	0	0	0
S1pr3	3	1.3557	1.09788	-0.0288871	0.0288871		0	0	0	0	0	0	0	0	0	0	0	0
Lhx2	3	4.45672	3.2906	0.0236234	-0.0236234		0	0	0	1	0	0	0	0	0	0	1	2
Akr1c13	3	1.78478	1.31617	0.0956411	-0.0956411		0	0	0	0	0	0	0	0	0	0	0	0
Pdgfrb	3	1.32482	0.927474	-0.00426168	0.00426168		0	0	0	0	0	0	0	0	0	0	0	0
Bcl2	3	1.54131	1.08006	0.0258095	-0.0258095		0	0	0	1	0	0	0	0	0	0	0	1
Panx1	3	1.3902	0.931168	-0.0363267	0.0363267		0	0	0	1	0	0	0	0	0	0	0	1
Atrnl1	3	1.20843	0.88944	-0.0215708	0.0215708		0	0	0	0	0	0	0	0	0	0	0	0
Slc4a8	3	1.55773	1.3285	-0.0514341	0.0514341		0	0	0	1	0	0	0	0	0	0	0	1
Abhd15	3	1.88075	1.80523	-0.107811	0.107811		0	0	0	1	0	0	0	0	0	0	0	1
4732471J01Rik	3	1.32208	1.39433	0.381112	-0.731088		0	0	0	0	0	0	0	0	0	0	0	0
Synj2	3	1.1537	1.06446	-0.148309	0.148309		0	0	0	1	0	0	0	0	0	0	0	1
Spns3	3	1.3025	1.41815	-0.0399634	0.0399634		0	0	0	0	0	0	0	0	0	0	0	0
Tacstd2	3	1.42852	1.46987	-0.195303	0.192557		0	0	0	0	0	0	0	0	0	0	0	0
Camk1	3	1.25652	0.973106	-0.081551	0.081551		0	0	0	0	0	0	0	0	0	0	1	1
Ephb2	3	1.17997	1.03327	-0.127319	0.127319		0	0	0	0	0	0	0	0	0	0	0	0
Pycr1	3	1.75588	1.47011	-0.289246	0.289246		0	0	0	0	0	0	0	0	0	0	0	0
Etv5	3	0.862333	0.885101	-0.392811	0.139451		0	0	0	1	0	0	0	0	0	0	0	1
Naglu	3	0.790973	1.21081	-0.17345	0.17345		0	0	0	0	0	0	0	0	0	0	0	0
Ddit4	3	1.03848	1.40071	-0.0284823	0.0284823		1	0	0	1	0	0	0	0	1	0	1	4
Fam83a	3	1.46362	1.72391	-0.0590514	0.0590514		0	0	0	0	0	0	0	0	0	0	0	0
Per1	3	0.909172	1.24968	-0.0860163	0.0860163		1	0	0	1	0	0	0	0	0	0	1	3
Gm12163	3	0.727085	1.38309	-0.230959	0.230959		0	0	0	0	0	0	0	0	0	0	0	0
Uxs1	3	0.940885	1.06997	-0.360946	0.360946		0	0	0	0	0	0	0	0	0	0	0	0
Gm17018	3	1.18265	0.968281	-0.138631	0.138631		0	0	0	0	0	0	0	0	0	0	0	0
Zeb2	3	1.32919	0.683066	-0.00670269	0.00670269		0	0	0	1	0	0	0	0	0	0	1	2
Cds1	3	1.31242	0.993436	0.158942	-0.158942		0	0	0	0	0	0	0	0	0	0	0	0
A530040E14RIK	3	1.20377	0.832964	0.131435	-0.131435		0	0	0	0	0	0	0	0	0	0	0	0
Fggy	3	1.22318	0.853262	0.233475	-0.390766		0	0	0	1	0	0	0	0	0	0	0	1
Efcab7	3	0.894316	0.950443	0.12676	-0.821252		0	0	0	0	0	0	0	0	0	0	0	0
Sccpdh	2	0.971132	0.797732	0.120665	-0.375245		0	0	0	1	0	0	0	0	0	0	0	1
Bambi	2	1.14829	1.06605	0.0710968	-0.0710968		0	0	0	0	0	0	0	0	0	0	0	0
Hormad2	2	4.08597	4.16412	0.154127	-0.612238		0	0	0	1	0	0	0	0	0	0	0	1
Hspa1b	2	0.946163	1.06808	0.0717991	-0.187783		0	0	0	0	0	0	0	0	0	0	0	0
Cmtm8	2	1.13669	1.2258	0.0661744	-0.233309		0	0	0	0	0	0	0	0	0	0	0	0
Arhgef10l	2	1.72603	1.83136	0.0588906	-0.0588906		0	0	0	0	0	0	0	0	0	0	0	0
Ankrd63	2	3.07663	3.07744	0.0248574	-0.0248574		0	0	0	0	0	0	0	0	0	0	0	0
Itga9	2	1.90991	2.19755	0.0954137	-0.0954137		0	0	0	1	0	0	0	0	0	0	0	1
F7	2	1.61516	1.47484	0.0193247	-0.0193247		0	0	0	0	0	0	0	0	0	0	0	0
Stx3	2	1.86758	1.69363	-0.0262607	0.0262607		0	1	0	0	0	0	0	0	0	0	0	1
Tdrd9	2	3.93357	3.72331	0.0271568	-0.0437393		0	0	0	0	0	0	0	0	0	0	0	0
Nol4	2	2.3662	2.30632	-0.0695718	-0.0695718		0	0	0	0	0	0	0	0	0	0	1	1
Gal3st1	2	1.40244	1.34625	-0.0664805	0.0664805		0	0	0	0	0	0	0	0	0	0	0	0
Sec24d	2	1.09344	1.04351	-0.076634	-0.000417345		0	0	0	0	0	0	0	0	0	0	0	0
Hspa2	2	0.96366	1.35251	0.0189918	-0.229871		0	0	0	1	0	0	0	0	0	0	0	1
Paqr8	2	1.22789	1.28782	-0.0301507	0.000454417		0	0	0	0	0	0	0	0	0	0	0	0
Perp	2	3.23674	3.61392	-0.214913	-0.0310319		0	0	0	0	0	0	0	0	0	0	0	0
Rtn4r	2	0.845811	0.95799	-0.140691	-0.0730704		0	0	0	0	0	0	0	0	0	0	0	0
Utp14b	2	1.08801	1.1752	-0.118065	-0.163025		0	0	0	0	0	0	0	0	0	0	0	0
Lgals1	2	1.27331	1.27038	-0.132747	-0.175889		0	0	0	0	0	0	0	0	0	0	0	0
Slc7a8	2	0.959113	1.15366	-0.032024	-0.0210425		0	0	0	0	0	0	0	0	0	0	0	0
Cebpa	2	1.01618	1.25066	-0.0640894	-0.00606035		0	0	0	0	0	0	0	0	0	0	1	1
4930503B20Rik	2	1.2159	1.54826	-0.10845	0.10845		0	0	0	0	0	0	0	0	0	0	0	0
Bpifc	2	1.09544	1.43183	-0.113774	-0.128754		0	0	0	0	0	0	0	0	0	0	0	0
Arl10	2	0.95023	1.29292	0.0355777	-0.130531		0	0	0	0	0	0	0	0	0	0	0	0
Spsb4	2	1.38356	2.00883	-0.00513954	-0.169173		0	0	0	0	0	0	0	0	0	0	0	0
Vat1	2	1.04094	1.81371	-0.00407382	0.00407382		0	0	0	0	0	0	0	0	0	0	0	0
Cntnap1	2	1.00568	1.48767	0.0128076	-0.0128076		0	0	0	0	0	0	0	0	0	0	0	0
Cuedc1	2	1.44577	1.37491	-0.188565	-0.537293		0	0	0	0	0	0	0	0	0	0	0	0
Spaca1	2	2.04041	1.78563	-0.146059	-0.231627		0	0	0	0	0	0	0	0	0	0	0	0
Bend4	2	1.65459	1.50062	-0.0913367	-0.0646671		0	0	0	0	0	0	0	0	0	0	1	1
B3gnt8	2	1.60017	1.37511	-0.0238247	-0.094878		0	0	0	0	0	0	0	0	0	0	0	0
Cd68	2	1.17609	0.861391	0.0107975	-0.0949397		0	0	0	0	0	0	0	0	0	0	0	0
Rab38	2	1.19049	0.939628	-0.252388	0.0607101		0	0	0	0	0	0	0	0	0	0	1	1
Col19a1	2	1.23657	0.989815	-0.111821	0.0555459		0	0	0	0	0	0	0	0	0	0	0	0
Plac1l	2	3.07609	2.45741	-0.335626	0.142806		0	0	0	0	0	0	0	0	0	0	0	0
8030453O22Rik	2	1.78734	1.33879	-0.240107	0.00918296		0	0	0	0	0	0	0	0	0	0	0	0
Flnb	2	1.6623	1.34895	-0.00905743	-0.026252		0	0	0	1	0	0	0	0	0	0	0	1
Gm14586	2	1.15808	0.888101	0	0		0	0	0	0	0	0	0	0	0	0	0	0
Serpina3i	2	1.79355	1.20384	0.000436987	-0.063608		0	0	0	0	0	0	0	0	0	0	0	0
Gm16380	2	1.22579	0.861493	0	0		0	0	0	0	0	0	0	0	0	0	0	0
1500011B03Rik	2	2.46347	1.63632	-0.170904	0.0808852		0	0	0	0	0	0	0	0	0	0	0	0
Plxnb2	2	2.14524	1.60722	0.0717158	-0.0717158		0	0	0	0	0	0	0	0	0	0	0	0
Plekhh3	2	1.53462	1.12181	0.0119804	-0.0119804		0	0	0	0	0	0	0	0	0	0	0	0
Cnn3	2	1.11676	0.834482	-0.134646	-0.118686		0	0	0	0	0	0	0	0	0	0	0	0
Il17rb	2	1.79669	1.30262	-0.14734	-0.270131		0	0	0	0	0	0	0	0	0	0	0	0
Foxn3	2	1.15527	0.858064	-0.202407	-0.0669801		0	0	0	1	0	0	0	0	0	0	1	2
Bex6	2	1.2072	1.02435	-0.0950682	-0.317991		0	0	0	0	0	0	0	0	0	0	0	0
Emr4	2	1.05603	0.71748	-0.154691	-0.267301		0	0	0	0	0	0	0	0	0	0	0	0
ENSMUSG00000052126	2	1.3331	0.97707	-0.552753	0.0989828		0	0	0	0	0	0	0	0	0	0	0	0
Gm15927	2	2.32374	0.944267	0.0682597	-0.396754		0	0	0	0	0	0	0	0	0	0	0	0
Ckm	2	1.28703	0.521843	-0.274995	-0.0299485		0	0	0	0	0	0	0	0	0	0	1	1
Gm10479	2	1.86753	1.81847	-0.361281	-0.361281		0	0	0	0	0	0	0	0	0	0	0	0
Ifi30	2	1.36936	1.34367	-0.337655	-0.242147		0	0	0	1	0	0	0	0	0	0	0	1
Samd13	2	1.37611	1.39648	-0.321437	-0.357373		0	0	0	0	0	0	0	0	0	0	0	0
Gm17199	2	1.70372	1.38422	-0.772896	-0.00186596		0	0	0	0	0	0	0	0	0	0	0	0
Gm16028	2	1.10594	0.864424	-0.431112	0.0709612		0	0	0	0	0	0	0	0	0	0	0	0
Ak4	2	1.69209	1.75533	-0.776141	-0.0284119		0	1	0	1	0	0	0	0	0	0	0	2
St14	2	1.19938	1.43952	-0.877911	0.0924886		0	0	0	0	0	0	0	0	0	0	0	0
Sh2d5	2	0.780698	0.827043	-0.680995	0.117851		0	0	0	0	0	0	0	0	0	0	0	0
Ptms	2	0.932006	1.47398	-0.356343	-0.08248		0	0	0	0	0	0	0	0	0	0	0	0
Gm17576	2	0.866187	0.836802	0.10745	-0.503639		0	0	0	0	0	0	0	0	0	0	0	0
Gm14859	2	1.5211	1.22948	-0.291698	-1.12316		0	0	0	0	0	0	0	0	0	0	0	0
Prdm16	2	1.13585	1.94681	0.0339775	-1.19172		0	0	0	0	0	0	0	0	0	0	0	0
Gm9855	2	1.07888	0.599395	-0.599395	-0.72488		0	0	0	0	0	0	0	0	0	0	0	0
Glt1d1	2	0.810184	1.87054	0.14485	-0.14485		0	0	0	0	0	0	0	0	0	0	0	0
Tns4	2	0.899065	1.15002	-0.197704	-0.121767		0	0	0	1	0	0	0	0	0	0	1	2
Cdkn1a	2	1.81758	2.18837	-0.416879	-0.330641		0	0	0	1	0	0	0	1	0	0	0	2
Gm12841	2	1.9149	2.29677	-0.224319	-0.523645		0	0	0	0	0	0	0	0	0	0	0	0
Adam3	2	1.34079	1.3185	-1.16768	-0.119988		0	0	0	0	0	0	0	0	0	0	0	0
B230307C23Rik	2	0.541007	0.647755	-0.227762	-0.628575		1	0	0	0	0	0	0	0	0	0	0	1
Ctsh	2	0.566571	1.20781	-0.286598	-0.405353		0	0	0	0	0	0	0	0	0	0	0	0
Gm6104	2	0.735668	1.28641	-0.26994	-0.26994		0	0	0	0	0	0	0	0	0	0	0	0
Gm10335	2	0.575603	1.29844	-0.0577785	-0.40429		0	0	0	1	0	0	0	0	0	0	0	1
Gpc1	2	0.62519	1.00974	-0.273677	-0.306023		0	0	0	0	0	0	0	0	0	0	1	1
Gm15283	2	1.59992	2.78283	-0.650754	-0.650754		0	0	0	0	0	0	0	0	0	0	0	0
Flt1	2	0.771839	1.12677	-0.143838	-0.0387		1	0	0	1	0	0	0	1	0	0	1	4
Dnase2a	2	0.575184	0.666172	-0.554555	-0.233313		0	0	0	1	0	0	0	0	0	0	0	1
Gm9027	2	0.501031	0.846803	-0.346148	-0.346148		0	0	0	0	0	0	0	0	0	0	0	0
Rps26-ps1	2	0.438683	1.31777	-0.506119	-0.438683		0	0	0	1	0	0	0	0	0	0	0	1
Rpl36-ps2	2	0.297936	1.32065	-0.518285	-0.550426		0	0	0	0	0	0	0	0	0	0	0	0
Tle3	2	0.381893	1.24239	-0.22329	-0.502336		0	0	0	1	0	0	0	0	0	0	1	2
Gm5937	2	0.275203	1.30071	-0.689088	-0.525471		0	0	0	0	0	0	0	0	0	0	0	0
D930007J09Rik	2	0.521306	1.81512	-1.2323	-0.967884		0	0	0	0	0	0	0	0	0	0	0	0
Dbi	2	0.572471	0.851381	-0.318227	-0.490295		0	0	0	0	0	0	0	0	0	0	0	0
Bambi-ps1	2	0.848594	0.966022	-0.578702	-0.370779		0	0	0	0	0	0	0	0	0	0	0	0
Arap2	2	0.603513	0.854715	-0.63092	-0.535862		0	0	0	0	0	0	0	0	0	0	0	0
Rab11fip4	2	1.09066	1.06095	-0.473753	-0.694448		0	0	0	1	0	0	0	0	0	0	0	1
Dab2ip	2	0.83131	0.808895	-0.344658	-0.457822		0	0	0	0	0	0	0	0	0	0	1	1
Ahdc1	2	0.813132	0.806105	-0.158029	-0.30195		0	0	0	0	0	0	0	0	0	0	0	0
Zbtb16	2	0.916834	0.943034	-0.239413	-0.40238		0	0	0	0	0	0	0	0	0	0	1	1
Klhl2	2	0.802326	0.706144	-0.479601	-0.273279		0	0	0	1	0	0	0	0	0	0	0	1
Abhd1	2	1.17742	1.03455	-0.649655	-0.201789		0	0	0	0	0	0	0	0	0	0	0	0
Jag1	2	0.850433	1.11136	-0.708183	-0.26952		0	0	0	0	0	0	0	0	0	0	0	0
Dmwd	2	0.662142	0.711113	-0.679867	-0.843592		0	0	0	0	0	0	0	0	0	0	0	0
Egln1	2	0.752939	0.539788	-0.643394	-0.596823		0	1	0	1	1	0	0	0	1	0	0	4
Gm11646	2	0.705381	0.507824	-0.19992	-0.59357		0	0	0	0	0	0	0	0	0	0	0	0
Rnf157	2	1.42473	1.06618	-0.214364	-0.774665		0	0	0	1	0	0	0	0	0	0	0	1
Faah	2	1.44486	1.17114	-0.0921706	-0.844257		0	0	0	1	0	0	0	0	0	0	0	1
Trf	2	1.08638	1.09253	-0.0168468	-0.590335		0	0	0	0	0	0	0	0	0	0	0	0
Smad7	2	0.842355	0.948934	0.00245092	-0.579986		0	0	0	1	0	0	0	0	0	0	1	2
Peg12	2	1.00228	1.13712	-0.212146	-0.785346		0	0	0	0	0	0	0	0	0	0	0	0
ENSMUSG00000059723	2	0.958136	0.550089	-0.21627	-0.461678		0	0	0	0	0	0	0	0	0	0	0	0
Gm17014	2	2.46716	1.04452	-0.996937	-0.996937		0	0	0	0	0	0	0	0	0	0	0	0
Rnf43	2	0.861986	0.38995	-0.467022	-0.446327		0	0	0	0	0	0	0	0	0	0	0	0
Cnbd2	2	1.13607	0.315474	-0.408163	-0.400131		0	0	0	0	0	0	0	0	0	0	0	0
BC028471	1	1.11911	0.973509	-0.987403	-1.38561		0	0	0	0	0	0	0	0	0	0	0	0
Dnmt3l	1	1.08808	0.716566	-1.71381	-0.397753		0	0	0	0	0	0	0	0	0	0	0	0
Tmlhe	1	0.845406	0.300016	-0.930848	-0.540261		0	0	0	0	0	0	0	0	0	0	0	0
Wdr90	1	1.30418	1.11566	-1.1109	-1.10552		0	0	0	1	0	0	0	0	0	0	0	1
Chdh	1	1.06149	0.675615	-1.13653	-0.962466		0	0	0	0	0	0	0	0	0	0	0	0
Gm14085	1	0.963984	1.20446	-1.00467	-0.943407		0	0	0	0	0	0	0	0	0	0	0	0
Gm15610	1	3.15302	3.28322	-3.31776	-3.31776		0	0	0	0	0	0	0	0	0	0	0	0
Zfhx3	1	0.483375	0.672907	-0.815992	-0.811532		0	0	0	0	0	0	0	0	0	0	1	1
Hp1bp3	1	0.355963	0.52341	-0.597543	-0.634944		0	0	0	1	0	0	0	0	0	0	0	1
Gm11585	1	0.394566	0.907771	-0.950321	-0.950321		0	0	0	0	0	0	0	0	0	0	0	0
Icosl	1	0.697492	0.602509	-0.739239	-1.00334		0	0	0	0	0	0	0	0	0	0	0	0
Rcn1	1	0.403266	0.349824	-0.759207	-0.81879		0	0	0	0	0	0	0	0	0	0	0	0
Ctbp2	1	0.114126	0.239061	-0.770867	-0.890068		0	0	0	0	0	0	0	0	0	0	0	0
Tgfbi	1	0.577653	0.340003	-1.55233	-1.58798		0	0	0	0	0	0	0	0	0	0	0	0
Haao	1	0.631056	0.191438	-1.06831	-1.23338		0	0	0	1	0	0	0	0	0	0	0	1
Gfod1	1	0.257015	0.113485	-0.865708	-1.0153		0	0	0	1	0	0	0	0	0	0	1	2
Sult6b1	1	0.380351	0.310205	-0.818556	-0.535993		0	0	0	0	0	0	0	0	0	0	0	0
Gm11477	1	0.217058	0.404944	-1.75836	-0.951911		0	0	0	0	0	0	0	0	0	0	0	0
Galnt6	1	0.192838	0.329652	-1.754	-1.34697		0	0	0	1	0	0	0	0	0	0	0	1
Gadd45b	1	0.562386	0.20866	-0.769138	-0.920927		0	0	0	1	0	0	0	0	0	0	1	2
Napsa	1	0.498573	0.0317113	-0.820679	-0.927994		1	0	0	0	0	0	0	0	0	0	0	1
Gm11574	1	0.240131	0.244605	-1.00932	-0.840573		0	0	0	0	0	0	0	0	0	0	0	0
Rara	1	0.454174	0.908367	-1.30903	-0.955421		0	0	0	1	0	0	0	0	0	0	0	1
Micu1	1	0.0125758	0.916379	-0.871872	-0.683562		0	0	0	0	0	0	0	0	0	0	0	0
Gm12196	1	0.0357288	0.690012	-0.924698	-0.924698		0	0	0	0	0	0	0	0	0	0	0	0
Ldlr	1	-0.11408	0.685595	-0.735331	-0.8859		0	0	0	0	0	0	0	0	0	0	0	0
Msantd3	1	0.198656	1.54816	-0.815324	-1.28201		0	0	0	0	0	0	0	0	0	0	0	0
Dusp6	1	0.115234	0.458858	-0.67677	-0.764857		0	0	0	0	0	0	0	0	0	0	0	0
Axin1	1	0.0306183	0.497213	-0.471933	-1.13308		0	0	0	1	0	0	0	0	0	0	1	2
ENSMUSG00000083189	1	0.737922	0.26431	-0.72678	-2.13324		0	0	0	0	0	0	0	0	0	0	0	0
ENSMUSG00000081198	1	0.737922	0.26431	-0.72678	-2.13324		0	0	0	0	0	0	0	0	0	0	0	0
Gm12437	1	1.99943	0.612356	-0.612356	-2.38881		0	0	0	0	0	0	0	0	0	0	0	0
Gm11526	1	1.24426	-0.132507	-2.04833	-2.04833		0	0	0	0	0	0	0	0	0	0	0	0
Il31ra	1	0.723444	-0.0334301	-0.984948	-0.823749		0	0	0	1	0	0	0	0	0	0	0	1
Ndrg1	1	0.393613	0.15062	-1.28133	-1.26192		0	1	0	1	1	0	1	0	0	0	0	4
Cntd1	1	0.654669	-0.0634185	-1.47486	-0.692293		0	0	0	0	0	0	0	0	0	0	0	0
Oxnad1	1	0.829757	0.231164	-0.501794	-1.13071		0	0	0	0	0	0	0	0	0	0	0	0
Gm11962	1	1.89349	0.498189	-0.498189	-0.498189		0	0	0	0	0	0	0	0	0	0	0	0
Galnt3	1	0.136532	0.401487	-1.81446	-1.84237		0	0	0	0	0	0	0	0	0	0	0	0
AC125149.1	1	0.158249	-0.158249	-1.44827	-1.85847		0	0	0	0	0	0	0	0	0	0	0	0
Pin4	1	0.044975	-0.044975	-1.44052	-2.09048		0	0	0	0	0	0	0	0	0	0	0	0
A530032D15Rik	1	0.220605	0.00214657	-0.682997	-1.37282		0	0	0	0	0	0	0	0	0	0	0	0
Dmc1	1	0.00787186	0.0890422	-1.76603	-1.37687		0	0	0	0	0	0	0	0	0	0	0	0
Stag3	1	0.181073	-0.00806501	-2.90127	-2.64878		0	0	0	1	0	0	0	0	0	0	1	2
Gm4735	1	0.21729	-0.120824	-1.06464	-1.1399		0	0	0	0	0	0	0	0	0	0	0	0
B3gnt5	1	0.128522	-0.128522	-2.03678	-1.55481		0	0	0	0	0	0	0	0	0	0	0	0
Hvcn1	1	-0.0356813	0.0356813	-1.76566	-1.76163		0	0	0	0	0	0	0	0	0	0	0	0
Cd63	1	0.132778	-0.132778	-2.07978	-2.10997		0	0	0	0	0	0	0	0	0	0	1	1
Ndufa3	1	0.00749735	-0.00749735	-1.18156	-1.51412		0	0	0	0	0	0	0	0	0	0	0	0
Plin3	1	0.127021	-0.127021	-1.0551	-1.19791		0	0	0	0	0	0	0	0	0	0	0	0
Ada	1	-0.0545512	0.0545512	-0.962695	-1.21747		0	0	0	0	0	0	0	0	0	0	0	0
Chst13	1	-0.243224	0.645256	-1.68	-1.77788		0	0	0	0	0	0	0	0	0	0	0	0
Pgam1	1	0.00103052	-0.00103052	-1.25507	-0.87944		1	0	0	1	0	0	0	0	0	0	1	3
Gm7803	1	0.892364	-0.892364	-4.51488	-2.82736		0	0	0	0	0	0	0	0	0	0	0	0
Tmem181b-ps	1	0.229185	-0.229185	-1.11636	-0.906353		0	0	0	0	0	0	0	0	0	0	0	0
Gm11631	1	0.284983	0.389877	-0.717616	-1.32692		0	0	0	0	0	0	0	0	0	0	0	0
Gm10059	1	1.70048	0.647721	-0.647721	-0.885123		0	0	0	0	0	0	0	0	0	0	0	0
1700087M22Rik	1	1.89404	1.43441	-2.50443	-1.43441		0	0	0	0	0	0	0	0	0	0	0	0
Gm10260	1	0.697335	0.311815	-0.997695	-0.311815		0	0	0	0	0	0	0	0	0	0	0	0
Zdhhc2	1	0.426009	0.399615	-0.399615	-1.14048		0	0	0	0	0	0	0	0	0	0	0	0
Gm12889	1	0.0723985	0.26572	-0.806104	-0.936798		0	0	0	0	0	0	0	0	0	0	0	0
Gm4149	1	0.956071	0.381006	-0.381006	-0.381006		0	0	0	0	0	0	0	0	0	0	0	0
Gm12663	1	1.11022	0.559067	-0.559067	-0.559067		0	0	0	0	0	0	0	0	0	0	0	0
